1 Title: The genomic determinants of adaptive evolution in a fungal  
2 pathogen

3 **Authors:** Jonathan Grandaubert<sup>1,2</sup>, Julien Y. Dutheil<sup>3,4,5</sup>, Eva H. Stukenbrock<sup>1,2,5</sup>

4

5 **Affiliations:**

6 1) Environmental Genomics Group, Max Planck Institute for Evolutionary Biology, August-  
7 Thienemann-Str. 2, 24306 Plön, Germany,

8 2) Christian-Albrechts University of Kiel, Am Botanischen Garten 1-9, 24118 Kiel, Germany,

9 3) Research group Molecular Systems Evolution, Max Planck Institute for Evolutionary  
10 Biology, August-Thienemann-Str. 2, 24306 Plön, Germany,

11 4) UMR 5554 Institut des Sciences de l'Evolution, CNRS, IRD, EPHE, Université de  
12 Montpellier, Place E. Bataillon, 34095, Montpellier, France.

13

14 5) **Corresponding authors:**

15 Eva H. Stukenbrock, Environmental Genomics, CAU Kiel, Am Botanischen Garten 1-11,  
16 24118 Kiel, Germany, Email: [estukenbrock@bot.uni-kiel.de](mailto:estukenbrock@bot.uni-kiel.de), phone: +49 (0) 431 880 6368

17 Julien Y. Dutheil, Research group Molecular Systems Evolution, Max Planck Institute for  
18 Evolutionary Biology, August-Thienemann-Str. 2, 24306 Plön, Germany, Email:  
19 [dutheil@evolbio.mpg.de](mailto:dutheil@evolbio.mpg.de), phone: +49 (0) 4522 763 298

20

21 **Keywords:** Genome evolution, adaptation, evolutionary rates, recombination, plant pathogenic  
22 fungi

23 **Runing Title:** Adaptive evolution in a fungal plant pathogen

## 24 **Abstract:**

25           Antagonistic host-pathogen co-evolution is a determining factor in the outcome of  
26 infection and shapes genetic diversity at the population level of both partners. While the  
27 molecular function of an increasing number of genes involved in pathogenicity is being  
28 uncovered, little is known about the molecular bases and genomic impact of hst-pathogen  
29 coevolution and rapid adaptation. Here, we apply a population genomic approach to infer  
30 genome-wide patterns of selection among thirteen isolates of the fungal pathogen  
31 *Zymoseptoria tritici*. Using whole genome alignments, we characterize intragenic  
32 polymorphism, and we apply different test statistics based on the distribution of non-  
33 synonymous and synonymous polymorphisms (pN/pS) and substitutions (dN/dS) to (1)  
34 characterise the selection regime acting on each gene, (2) estimate rates of adaptation and (3)  
35 identify targets of selection. We correlate our estimates with different genome variables to  
36 identify the main determinants of past and ongoing adaptive evolution, as well as purifying and  
37 balancing selection. We report a negative relationship between pN/pS and fine-scale  
38 recombination rate and a strong positive correlation between the rate of adaptive non-  
39 synonymous substitutions ( $\omega_a$ ) and recombination rate. This result suggests a pervasive role of  
40 Hill-Robertson interference even in a species with an exceptionally high recombination rate  
41 (60 cM/Mb). Moreover, we report that the genome-wide fraction of adaptive non-synonymous  
42 substitutions ( $\alpha$ ) is  $\sim 44\%$ , however in genes encoding determinants of pathogenicity we find a  
43 mean value of  $\alpha \sim 68\%$  demonstrating a considerably faster rate of adaptive evolution in  
44 this class of genes. We identify 787 candidate genes under balancing selection with an  
45 enrichment of genes involved in secondary metabolism and host infection, but not predicted  
46 effectors. This suggests that different classes of pathogenicity-related genes evolve according  
47 to distinct selection regimes. Overall our study shows that sexual recombination is a main  
48 driver of genome evolution in this pathogen.

## 49 Introduction

50 Antagonistic host-pathogen interactions drive co-evolutionary dynamics between  
51 pathogens and their hosts. Signatures of selection in genomes inform about mechanisms of  
52 evolution and identify targets of selection at interacting loci (Möller & Stukenbrock 2017). In  
53 general, genome studies of microbial pathogens have focused on rapidly evolving genes  
54 involved in pathogenicity, such as “effector” genes encoding proteins that interfere with host  
55 defenses and may determine host range of the pathogen (Lo Presti *et al.* 2015). Effector genes  
56 of fungal pathogens have frequently been found to associate with repetitive DNA and it is  
57 proposed that repeat rich genome compartments provide particularly favorable environments  
58 for rapid evolution of new virulence specificities (e.g. (Ma *et al.* 2010; Spanu *et al.* 2010;  
59 Klosterman *et al.* 2011; Daverdin *et al.* 2012)). Repetitive DNA may locally increase mutation  
60 rate and contribute to gene duplications and structural variation among alleles. Yet little is  
61 known about the factors that shape genome evolution in fungal pathogens, in particular the  
62 interplay of mutation, natural selection, genetic drift and, for sexually reproducing species,  
63 recombination along the genome of fast evolving pathogens.

64 Evolution of genes involved in the antagonistic interaction with the host can be  
65 driven by positive selection whereby new alleles recurrently replace existing alleles in response  
66 to allelic changes in the host, a scenario termed arms race evolution (Van Valen 1973; Tellier *et*  
67 *al.* 2014). Variation in pathogenicity related genes can also be maintained by balancing  
68 selection, a trench-warfare scenario where a set of alleles are maintained in the population over  
69 long evolutionary times (Stahl *et al.* 1999). In plants, balancing selection has been described as  
70 a main driver of evolution in genes encoding resistance proteins (e.g. (Tian *et al.* 2002; Huard-  
71 Chauveau *et al.* 2013)), however the importance of balancing selection in pathogen genomes is  
72 less understood.

73 Population genomic data reflect signatures of past and on-going selection acting on  
74 the organism. While past signatures of selection can be related to ecological specialization, on-

75 going positive selection reflects local adaptation in the existing population. In plant pathogens,  
76 signatures of on-going selection can reflect host-pathogen arms race or trench warfare  
77 evolution as well as adaptations to other local environmental conditions, in agricultural  
78 systems notably fungicide treatments (Hayes *et al.* 2015; Delmas *et al.* 2017). Rapid adaptation  
79 is fueled primarily by large effective populations sizes as well as high recombination and  
80 mutation rates that promote the emergence, spread and fixation of new advantageous alleles. In  
81 research of Eukaryote pathogen genome evolution, most studies have used genome scans to  
82 detect outlier genes and genomic regions. Based on the finding of high variability in specific  
83 genome compartments it has been proposed that plant pathogens represent exceptional outliers  
84 in terms of evolutionary rates (Raffaele & Kamoun 2012; Upson *et al.* 2018). Nevertheless,  
85 quantitative measures of evolution in pathogen genomes are missing to test this hypothesis.

86           In this study we have addressed the impact of selection on genome evolution in a  
87 fungal plant pathogen, *Zymoseptoria tritici*. *Z. tritici* infects wheat and reproduces by the  
88 production of asexual spores in infected leaf tissues and by sexual recombination between  
89 isolates of opposite mating type (Waalwijk *et al.* 2002). Previous studies based on mating  
90 experiments and population genomic data have reported exceptional high recombination rates  
91 in this species (~60 cM/Mb), including intragenic recombination hotspots that underline the  
92 putative key role of recombination in evolution of this species (Croll *et al.* 2015; Stukenbrock  
93 & Dutheil 2017). The genome of *Z. tritici* consists of thirteen core and several accessory  
94 chromosomes. The latter are present at variable frequencies in different individuals,  
95 constituting a particular case of karyotypic polymorphism (Goodwin *et al.* 2011). The  
96 accessory chromosomes comprise repeat rich, heterochromatic DNA with a low gene content  
97 and they encode traits with quantitative effects on virulence (Grandaubert *et al.* 2015;  
98 Schotanus *et al.* 2015; Habig *et al.* 2017). We have previously shown that evolutionary rates on  
99 these chromosomes are particularly high suggesting that genes on the accessory chromosomes  
100 in general evolve under less selective constraints (Stukenbrock *et al.* 2010). Previous studies  
101 based on comparative population genomic analyses of *Z. tritici* and two closely related species,

102 *Zymoseptoria pseudotritici* and *Zymoseptoria ardabiliae* used genome-wide estimates of non-  
103 synonymous and synonymous divergence to identify past species-specific signatures of  
104 selection in the wheat pathogen (Stukenbrock *et al.* 2010, 2011). Functional characterization of  
105 some of these genes revealed amino acid substitutions important for *in planta* development and  
106 asexual spore formation in the wheat-adapted pathogen, and thereby confirmed the use of  
107 evolutionary predictions to identify functionally relevant traits (Poppe *et al.* 2015).

108         We here apply a population genomics approach to infer genome-wide signals of  
109 natural selection, including purifying, positive and balancing selection among thirteen isolates  
110 of *Z. tritici* collected from bread wheat in Europe and the Middle East. We specifically ask to  
111 which extent recombination contributes to adaptive evolution in a sexual pathogen. Our  
112 analyses based on more than 1.4 million single nucleotide polymorphisms (SNPs) and  
113 including 700,000 coding sites allow us to identify past and on-going signatures of selection in  
114 the genome of *Z. tritici*. Our analyses reveal a strong importance of recombination in gene  
115 evolution, for both positive and negative selection, and a particularly high rate of adaptive  
116 substitutions in genes encoding putative effectors. On the other hand, balancing selection is  
117 more prevalent in genes located in repeat-rich parts of the genome implying that transposable  
118 elements also contribute to the maintenance of genetic variation. Overall, our analyses  
119 underline the potential of rapid adaptation of virulence related traits in this important  
120 agricultural pathogen.

## 121 **Results and Discussion**

### 122 **Population structure of *Z. tritici* correlates with geographical origin**

123         We generated a population genomic dataset of thirteen *Z. tritici* isolates obtained  
124 from different field populations in Europe and Iran (Table S1). Given the high extent of  
125 structural variation in genomes of *Z. tritici* isolates, we *de novo* assembled and aligned the  
126 thirteen genomes. After filtering (see Material and Methods), the resulting multiple genome

127 alignment of ~27 Mb (Table S2) comprised a total of 1,489,362 SNPs of which approximately  
128 50% locate in protein coding regions. The SNP data was used to compute the overall genetic  
129 diversity of the sample showing a mean value of  $\pi = 0.022$  per site. Importantly, the multiple  
130 genome alignment of *de novo* assembled genomes is a priori exempt of paralogous sequences.

131 We first used the genomic data to investigate the relationship of the *Z. tritici* isolates.  
132 We assessed population genetic structure by analyzing the ancestral recombination graph of the  
133 thirteen genomes. To this end, we slid 10 kb windows along the multiple genome alignment,  
134 and estimated the genealogy for each window. The resulting 1,850 trees were combined into a  
135 super tree (Fig. 1A). If the sample of genomes is taken from a panmictic population with  
136 recombination, the super tree is expected to be a star tree. However, here we observe at least  
137 two clusters, one comprising all European isolates and the other comprising two isolates  
138 collected in Iran (Fig. 1A). We further investigated population structure using the program  
139 ADMIXTURE (Alexander *et al.* 2009) and found the strongest support for a model with two  
140 ancestral populations supporting the tree-based clusters of European and Iranian isolates (Fig.  
141 1B). This pattern is consistent with some extent of geographical barriers preventing gene flow  
142 between European and Middle East *Z. tritici* populations, and possibly local adaptation to  
143 distinct host genotypes, i.e. wheat cultivars.

#### 144 **Recombination contributes to high rates of adaptive evolution in *Z. tritici***

145 We next aimed to obtain a quantitative assessment of adaptive substitutions in the  
146 genome of *Z. tritici*. To this end, we first estimated the non-synonymous and synonymous  
147 divergence  $dN$  and  $dS$  using a genome alignment of *Z. tritici* and its sister species *Z.*  
148 *ardabiliae*. Furthermore, we used the *Z. tritici* SNP data to compute the unfolded site frequency  
149 spectrum (SFS) of synonymous and non-synonymous sites using *Z. ardabiliae* as outgroup.  
150 The synonymous nucleotide diversity was on average over all genes 0.054, reflecting the high  
151 diversity in this species. By contrasting divergence and polymorphism data, we estimated the  
152 parameters  $\alpha$  (proportion of adaptive non-synonymous substitutions,  $dN_a / dN$ ) and  $\omega_a$

153 (proportion of the dN / dS ratio that is attributable to adaptive mutations,  $dN_a / dS$ ). The SFS is  
154 strongly affected by demography and the presence of slightly deleterious mutations segregating  
155 at low frequencies (Eyre-Walker & Keightley 2007). State-of-the-art statistical methods  
156 account for the latter by modeling the distribution of fitness effects (DFE) of mutations  
157 (Gossmann *et al.* 2010; Galtier 2016). Potential confounding demographic factors such as  
158 variable population size, population structure and linked selection are accounted for by fitting  
159 additional parameters to accommodate deviations from a constant size neutral model of  
160 evolution. This generic correction assumes that these factors affect both synonymous and non-  
161 synonymous mutations equivalently.

162         We estimated  $\alpha$  as well as  $\omega_a$ , the rate of adaptive substitutions, using four distinct  
163 DFE models accounting for mutations with both slightly deleterious and beneficial effects (see  
164 Materials and Methods) and found that the Gamma-Exponential model best fitted our data  
165 (Table 1) in agreement with studies from animals (Galtier 2016). This suggests the existence of  
166 slightly deleterious, as well as slightly beneficial segregating mutations in the genome of *Z.*  
167 *tritici* (Table 1). The estimates provide an  $\alpha$  value of 35% as a genome average, and an  $\omega_a$  value  
168 of 0.044. Both values are in the range of what is observed for Mammals (with the exception of  
169 Primates) but considerably higher than estimates from plants (Gossmann *et al.* 2010; Galtier  
170 2016). In candidate effector genes, however, the rate of mutations fixed by selection is more  
171 than twice as high as in non-effector genes ( $\omega_a$  equal to 0.120 vs. 0.048, Table 1), with 60% of  
172 non-synonymous substitutions in these genes inferred to be adaptive. This average estimate is  
173 close to the highest values reported in animals (Galtier 2016), and reflects the strong selective  
174 pressure acting on these genes. We note that estimates of  $\alpha$  and  $\omega_a$  are slightly higher when  
175 only non-effector genes are used (6,639 genes) than when using the complete gene set (6,767  
176 genes), a small difference that likely results from sampling variance. In order to assess the  
177 significance of the observed differences between effector and non-effector genes while  
178 accounting for the difference in gene numbers in both categories (128 and 6,639 genes,  
179 respectively), we performed a bootstrap analysis where we estimated  $\alpha$  and  $\omega_a$  in random

180 samples of 128 genes in each category. The results of 100 resamples are shown on Fig. 2,  
181 revealing a highly significant difference between the two distributions (Wilcoxon test, p-value  
182  $< 2.2 \cdot 10^{-16}$ ) and confirming the significantly higher rate of adaptation in effector genes.

183         We hypothesized that recombination could be an important driver of adaptive  
184 evolution in *Z. tritici*. Previous inference of recombination maps in *Z. tritici* based on  
185 experimental crosses and population genomic data have revealed exceptionally high rates of  
186 recombination in this species (Croll *et al.* 2015; Stukenbrock & Dutheil 2017). To assess the  
187 role of recombination in adaptive evolution of *Z. tritici* we used the recombination maps  
188 generated in these previous studies. Genetic maps resulting from crossing experiments allow  
189 inference of the recombination rate  $r$  (measured as cM / Mb), but are limited in resolution.  
190 Conversely, linkage disequilibrium-based maps generated from population genomic data offer  
191 an improved resolution, but only allow inference of  $\rho = 4 \cdot N_e \cdot r$ , where  $N_e$  is the effective  
192 population size. As such,  $\rho$  is a proxy for  $r$  that is affected by both selection and demography.  
193 We clustered all analyzed genes according to their  $r$  and  $\rho$  values, and estimated  $\alpha$  and  $\omega_a$  for  
194 each case using the Gamma-Exponential distribution of fitness effects. In order to assess the  
195 variance of our estimates and their robustness to the sampled genes, we further conducted a  
196 bootstrap analysis where we sampled genes in each category 100 times. We report a significant  
197 positive correlation between  $\alpha$  (averaged over 100 bootstrap replicates) and  $r$  (Kendall's tau =  
198 0.31, p-value = 0.004354) and  $\omega_a$  and  $r$  (Kendall's tau = 0.31, p-value = 0.006041). We note  
199 that similar correlations are observed when  $\rho$  is used instead of  $r$ , or when effector genes are  
200 discarded (Supplementary Data). These results suggest that a higher recombination rate favors  
201 the fixation of adaptive mutations, as expected under a Hill-Robertson interference scenario,  
202 where selected mutations reduce the effective population size at linked loci (Hill & Robertson  
203 1966; Marais & Charlesworth 2003).

204         We further explored the relationship between  $\alpha$ ,  $\omega_a$  and  $r$ . We fitted four models:  
205 linear (as in (Campos *et al.* 2014)), power law, curvilinear (as in (Castellano *et al.* 2016)), and  
206 logarithmic (see Materials and Methods). While we find a higher support for the logarithmic



207 model (Fig. 3), the effect is very weak and our data does not allow further estimation of the  
208 asymptotic value (Castellano *et al.* 2016). When using  $\rho$  instead of  $r$ , the curvilinear model is  
209 preferred when all genes are considered, but the power law offers a better fit when effectors are  
210 excluded (Supplementary Material).

211 In summary, our results represent a quantitative assessment of adaptive evolution in  
212 the genome of a fungal pathogen and reveal a strong role of recombination on adaptation (Fig.  
213 3). The exceptionally high rate of adaptation in effector genes (Fig. 2) likely reflects arms race  
214 evolution driven by the antagonistic interaction of *Z. tritici* and its host.

### 215 **Local rates of recombination are correlated with the strength of purifying** 216 **selection revealing pervasive background selection**

217 We next addressed the genome-wide strength of purifying selection in protein coding  
218 genes of *Z. tritici* using the ratio of non-synonymous to synonymous polymorphisms ( $pN / pS$   
219 ratio). We computed  $pN$  and  $pS$  for each gene as the average pairwise heterozygosity  
220 (Romiguier *et al.* 2014; Ellegren & Galtier 2016). To investigate which genome parameters  
221 impact the strength of purifying selection in *Z. tritici*, we compared the  $pN / pS$  ratio for each  
222 gene to 1) the mean gene expression, 2) the GC content at third codon positions (GC3), 3) the  
223 protein length, 4) the local recombination rate, 5) the density in protein coding sites and 6) the  
224 density in transposable elements. We used *Z. tritici* gene expression data from early host  
225 colonization (four days after spore inoculation on leaves of seedlings of a susceptible wheat  
226 host) and *in vitro* growth (Kellner *et al.* 2014). Recombination rates were averaged in 20 kb  
227 windows and recombination was analysed independently as  $r$  (Croll *et al.* 2015) and  $\rho$   
228 (Stukenbrock & Dutheil 2017). We further considered whether the gene 7) is an effector  
229 candidate and 8) is located on an accessory chromosome (Fig. 4). We restricted our analysis to  
230 genes for which  $pN / pS$  could be computed (6,627 genes, see Materials and Methods) and for  
231 which  $pN / pS$  was estimated to be  $< 1$  (6,621 genes).

232 We identify several variables that significantly impact the strength of purifying  
233 selection (summarized in Table 2). Mean gene expression and GC at third codon position have  
234 the strongest effect on pN / pS (Fig. 4A and 4B), displaying highly significant negative  
235 correlations (Kendall's tau = -0.369 and -0.237 respectively, p-values <  $2.2 \cdot 10^{-16}$  in both cases).  
236 Consistent with this observation, studies in yeast and bacteria have previously documented a  
237 strong impact of expression levels on gene evolution whereby highly expressed genes are more  
238 conserved reflected as lower pN / pS values (Drummond *et al.* 2006; Liao *et al.* 2006). GC3  
239 and mean gene expression are intrinsically highly correlated (Kendall's tau = 0.222, p-value <  
240  $2.2 \cdot 10^{-16}$ ), possibly reflecting biases in codon usage whereby optimal codons are GC-rich at  
241 their third position (Fig. S1), as also observed in other organisms (Duret & Mouchiroud 1999).  
242 An alternative explanation for the effect of the GC content on pN / pS could be a possible  
243 indirect effect of recombination as we also observe a positive correlation of GC3 and the  
244 recombination rate (Kendall's tau = 0.097, p-value <  $2.2 \cdot 10^{-16}$ ). A similar correlation of  
245 recombination and GC3 is found in other organisms (Duret 2002). In *Saccharomyces*  
246 *cerevisiae* this correlation has been explained by the impact of biased gene conversion on  
247 sequences evolution (Birdsell 2002). However, a thorough search for signatures of GC-biased  
248 gene conversion did not find any pervasive effect of this phenomenon in *Z. tritici* (Stukenbrock  
249 & Dutheil 2017). The relationship between pN / pS and GC3 is therefore more likely a by-  
250 product of the correlation with gene expression.

251 Protein size is slightly positively correlated with pN / pS (Table 2), although the  
252 effect is due to very short proteins being more conserved and the observed effect perishes when  
253 testing only proteins with > 100 amino acids (excluding 348 proteins out of 6,621, Kendall's  
254 tau = 0.012, p-value = 0.1443, Fig. 4C). Gene density, estimated in a 50 kb regions centered on  
255 the gene (see Material and Methods), does not have a significant effect on pN / pS (Kendall's  
256 tau = 0.0067, p-value = 0.4127, Fig. 4D). The genome of *Z. tritici* is compact and uniform in  
257 terms of gene localization, and the distribution of gene density is almost normal with a median  
258 around 54%. This likely explains that gene density does not have an impact on strength of

259 purifying selection. Conversely, we observe a significant negative correlation between  $pN / pS$   
260 and recombination rate  $r$  (Kendall's tau = -0.031, p-value =  $1.85 \cdot 10^{-4}$ , Fig. 4E) or  $\rho$  (Kendall's  
261 tau = -0.039, p-value =  $1.52 \cdot 10^{-6}$ , Fig. 4F and Fig. 5). These results are in agreement with a  
262 model of background selection, where purifying selection at linked loci with low  
263 recombination rates reduces the local effective population size, therefore reducing the efficacy  
264 of selection and allowing slightly deleterious mutations to spread more frequently than at loci  
265 with high recombination rates (Charlesworth *et al.* 1993; Nordborg *et al.* 1996).

266           Background selection is notably expected to be stronger in regions of higher density  
267 of coding sites, implying that the negative correlation between recombination and  $pN / pS$   
268 should be higher in gene-dense regions. To further test this effect of coding site density, we  
269 split our gene set in two subsets, whether the density of coding sites was below (low-density  
270 set) or above (high-density set) the median. For the low-density set, we report a marginally  
271 significant negative correlation between  $r$  and  $pN / pS$  (Kendall's tau = -0.022, p-value =  
272  $0.05856$ ), while the correlation is stronger and significant for the high-density set (Kendall's  
273 tau = -0.039, p-value =  $7.89 \cdot 10^{-04}$ ). These results provide evidence that background selection  
274 impacts the genome of *Z. tritici*, and support a central role of recombination in the removal of  
275 non-adaptive mutations in the genome of *Z. tritici* consistent with patterns described in other  
276 species such as *Drosophila melanogaster* (Campos *et al.* 2014). We note, however, that the  
277 effect of recombination is smaller than the one of functional variables such as mean expression.  
278 This is likely related, we hypothesize, to the globally high level of recombination and reduced  
279 linkage throughout the genome of *Z. tritici*.

280           One part of the *Z. tritici* genome where recombination is low is the accessory  
281 chromosomes (Stukenbrock & Dutheil 2017). This low recombination rate is reflected in our  
282 estimates of purifying selection. We find a significantly higher  $pN / pS$  ratios in genes located  
283 on accessory chromosomes (Wilcoxon rank test, p-value =  $0.0162$ , Fig. 4G), and on the right  
284 arm of chromosome 7 (Fig. 5), a genomic region predicted to be an ancestral accessory  
285 chromosome fused with a core chromosome (Schotanus *et al.* 2015). Accessory chromosomes

286 have a reduced effective population size due to their presence/absence variation among  
287 individuals, resulting in a reduced efficacy of selection and a higher pN / pS ratio on these  
288 chromosomes..

289           Finally, we compared the strength of purifying selection of effector and non-effector  
290 genes, and find that genes predicted to encode effector proteins have a significantly higher pN /  
291 pS ratio compared to other genes (Wilcoxon rank test, p-value =  $1.5 \cdot 10^{-14}$ , Fig. 4H). We  
292 speculate that this pattern is due to the fast evolution through positive selection of this  
293 particular category of genes, and the higher pN / pS ratio in these genes reflects the fixation of  
294 slightly deleterious mutations by linkage.

## 295 **Detection of on-going balancing selection in *Z. tritici* identifies candidate** 296 **pathogenicity factors**

297           The recurrent interaction with different host genotypes can confer the maintenance of  
298 multiple alleles at selected loci in the pathogen population. To identify specific sites and genes  
299 in the *Z. tritici* genome showing signatures of balancing selection, we fitted models of codon  
300 sequence evolution as implemented in the CodeML program of the PAML package to detect  
301 genes with significant signatures of balancing selection using likelihood ratio tests (Yang  
302 2007). Two models are typically compared: a model with sites evolving only under neutrality  
303 or purifying selection, with an  $\omega$  ratio (non-synonymous rate of polymorphisms / synonymous  
304 rate of polymorphisms) equal or below one (neutral model with purifying selection), and a  
305 model allowing for some sites to evolve under positive selection with a  $\omega$  ratio above one  
306 (positive selection model). A likelihood ratio test (LRT) is then used to test for the occurrence  
307 of positive selection. When applied to population data, sites with  $\omega > 1$  can reflect balancing  
308 selection (Anisimova *et al.* 2001). We fitted codon models for genes present in at least three  
309 isolates (83% of genes located on core chromosomes and 31% of genes on the accessory  
310 chromosomes, Table S3). After correcting for multiple testing, we identified a final set of 787

311 genes (including 24 on the accessory chromosomes) evolving under balancing selection (false  
312 discovery rate  $< 0.01$ , Table S3).

313           As selection tests based on codon model comparison were previously shown to  
314 potentially suffer from an inflated false discovery rate (FDR) in the presence of recombination  
315 (Anisimova *et al.* 2003), we conducted simulations with parameters reflecting the  
316 characteristics of our data set (see Material and Methods). In agreement with previous results,  
317 we report an increase in FDR in the presence of recombination within the gene (Fig. 6). While  
318 our results appear to be relatively independent of the level of diversity in the alignment, we  
319 report a strong effect of the number of sites in the alignment: for a given number of  
320 recombination events, we see a higher FDR in long compared to short genes. This suggests that  
321 the recombination rate, which is lower in longer genes for a given number of recombination  
322 events, is not the only determinant of erroneous rejection of the null model. Large alignments,  
323 on the contrary, carry more statistical signal (Anisimova *et al.* 2001) and can lead to strong  
324 support of the wrong model in case an incorrect tree is provided, an effect that is independent  
325 of the actual number of recombination events. In agreement with this hypothesis, we see that  
326 the FDR also increases with the number of sequences in the alignment (Fig. 6). To assess the  
327 extent of false discovery in our analysis, we sorted genes for which all 13 individuals were  
328 present (6,627 genes) according to their corresponding protein lengths: more than 100, 500,  
329 1,000 and 2,000 amino acids, respectively. We find that the proportion of genes significantly  
330 rejecting the null hypothesis of no positive selection is systematically higher than the  
331 maximum observed FDR for the corresponding length (Fig. 6). This suggests that false  
332 discovery due to recombination does not explain all of our candidates and that the selection test  
333 was able to capture biological signal.

334           To further assess the gene-specific selection regime, we computed Tajima's D for  
335 each gene in our data set. We find that the distribution of Tajima's D is globally shifted toward  
336 negative values (Fig. 7), as expected for coding sequences under purifying selection.  
337 Furthermore, *Z. tritici* was previously found to have undergone population expansion since the

338 domestication of wheat and speciation of the pathogen (Stukenbrock *et al.* 2007). This  
339 population expansion also contributed to the overall negative Tajima's D values. We further  
340 observe that there is no significant differences between genes encoding predicted effector  
341 proteins and others (Wilcoxon rank test, p-value = 0.1597). Genes predicted to be under  
342 balancing selection by PAML, however, display significantly higher Tajimas' D values  
343 (Wilcoxon rank test, p-value <  $2.2 \cdot 10^{-16}$ ), a typical signature of balancing selection (Tajima  
344 1989). However, given the population structure that we observe, it cannot be excluded that for  
345 some of these genes, the signal of the LRT results from population differentiation. In such case,  
346 the detected gene could be under positive selection resulting from local adaptation. In the  
347 following, we further investigate the genome distribution and biological function of genes  
348 detected by PAML.

349         In several pathogen genomes, rapidly evolving genes are found clustered in  
350 particular genomic environments often associated with repetitive sequences (e.g (Raffaele *et*  
351 *al.* 2010; Dutheil *et al.* 2016)). To address whether the same pattern is found in *Z. tritici*, we  
352 assessed the spatial distribution of genes under balancing selection along chromosomes (see  
353 Materials and Methods). Of the 787 positively selected genes, 240 are located within a distance  
354 of 5 kb from each other and thereby form 108 clusters containing two to four genes with  
355 signatures of positive selection. At the genome scale, clusters containing two or three genes do  
356 not show a significant pattern as the same pattern can be obtained by randomly distributing the  
357 positively selected genes across the genome. However, there are two significant clusters (p-  
358 value =  $1.8 \cdot 10^{-3}$ ) containing four and eight genes, respectively. The clusters comprising four  
359 genes is located in a 24 kb region of chromosome 5, and the cluster comprising eight genes in a  
360 31 kb region of chromosome 9. For genes in both clusters no functional relevance can be  
361 assigned, but the clusters represent interesting candidates for future functional studies.

## 362 **The genomic determinants of balancing selection in *Z. tritici***

363           In order to test which factor drives the occurrence of balancing selection in the *Z.*  
364 *tritici* genome, we fitted (generalized) linear models. We assessed the impact of 1) the  
365 recombination rate, 2) the density in protein coding sites, 3) the density in transposable  
366 elements (TE), 4) whether the gene is predicted to encode an effector protein, and 5) the mean  
367 gene expression (see Material and Methods). We fitted a binary logistic model, where the  
368 response variable is whether a gene is predicted to be under positive balancing selection by  
369 PAML. We find that positive selection is less likely at highly expressed genes (Table 3), an  
370 effect that, we hypothesize, is due to highly expressed genes being on average more  
371 constrained (see above).

372           We find a significant effect of effector encoding genes (Table 3), that is, effector  
373 genes are, intriguingly, less likely to be under balancing selection than non-effector encoding  
374 genes. As described above, we find that effector genes tend to undergo a higher rate of adaptive  
375 evolution, and our analyses thereby suggest that distinct categories of genes are evolving under  
376 arms race (recurrent selective sweeps) and trench-warfare (balancing selection) scenarios in the  
377 pathogen genome. The rate of recombination has a weak but significant positive effect on the  
378 occurrence of positive selection, *i.e.* genes detected to be under balancing selection are more  
379 frequent in highly recombining regions (Table 3). This effect can be interpreted as a better  
380 efficacy of selection in highly recombining regions, but can also be due to an increased false  
381 discovery rate in the presence of recombination. In order to disentangle the two hypotheses, we  
382 fitted a similar linear model with Tajima's D as a response variable and find consistent results  
383 where recombination rate has a significant positive effect on Tajima's D (Table 3).

384           We further extended our analyses of the genes predicted to be under balancing  
385 selection by characterizing known protein domains. From the 787 candidate genes, 602 of the  
386 encoded proteins (76.5%) have an *in silico* attributed function or harbor known protein  
387 domains. We conducted a PFAM domain enrichment analyses and identified 21 significantly  
388 enriched domains (FDR  $\leq$  0.05) (Table S4). These domains can be grouped into different

389 categories based on their associated molecular function and include carbohydrate-active  
390 enzymes (CAZymes), polyketide synthases (PKS), non-ribosomal peptide synthetases (NRPS),  
391 and cellular transporters (Table S4). Several of these categories are relevant for the pathogen to  
392 interact with its host. For example, CAZymes are proteins involved in the break down of  
393 glycosidic bonds contained in plant cell walls (André *et al.* 2014), and PKS and NRPS are  
394 multimodular enzymes involved in the biosynthesis of secondary metabolites of which many  
395 also have been shown to be involved in virulence of plant pathogenic fungi (Howlett 2006).  
396 Among the positively selected *Z. tritici* genes, we also searched for homologs of known  
397 virulence factors described in other plant pathogens. The PFAM domain PF14856 corresponds  
398 to the mature part of a virulence factor Ecp2 described in the tomato fungal pathogen  
399 *Cladosporium fulvum* (Van den Ackerveken *et al.* 1993). Ecp2 has been described in several  
400 other plant pathogens (Stergiopoulos *et al.* 2010) and has three homologs in *Z. tritici*. We find  
401 that two of these homologs comprise sites under positive selection supporting a virulence  
402 related role of this gene also in this wheat pathogen.

#### 403 **Signatures of past selection in *Z. tritici* and related species**

404 In a previous study the evolutionary history of *Z. tritici* was inferred using a whole  
405 genome coalescence analyses (Stukenbrock *et al.* 2011). We showed that divergence of *Z.*  
406 *tritici* and its sister species *Z. pseudotritici* occurred recently and likely coincides with the  
407 onset of wheat domestication and thereby specialization of *Z. tritici* to a new host. We  
408 hypothesize that genes important for the colonization of distinct hosts have been under  
409 selection during the divergence of *Zymoseptoria* species. To infer signatures of past selection  
410 we applied the branch model implemented in the program package PAML to estimate the  
411 branch-specific dN / dS ratio for core *Zymoseptoria* genes (present in four species *Z. tritici*, *Z.*  
412 *pseudotritici*, *Z. ardabiliae* and *Z. brevis*) (Yang & Nielsen 1998; Grandaubert *et al.* 2015). The  
413 branch-specific dN / dS ratios reflect the proportion of non-synonymous to synonymous  
414 substitutions accumulated in each branch of the *Zymoseptoria* phylogeny. Our analyses



415 identified 47 genes with a dN /dS ratio > 1 on the *Z. tritici* branch indicative of an increased  
416 non-synonymous divergence, 54 genes in *Z. pseudotritici*, 60 genes in *Z. brevis* and 15 genes in  
417 *Z. ardabiliae* (Table 4). Based on their putative function in host-pathogen interactions, we  
418 hypothesized that some positively selected genes encode secreted proteins and putative  
419 effectors. In order to test this hypothesis, we fitted linear models with branch specific dN / dS  
420 ratios as response variables and whether the corresponding gene family encodes an effector or  
421 not in *Z. tritici* as explanatory variable. For all four extant species and the common ancestor of  
422 *Z. tritici* and *Z. pseudotritici*, we find a significantly higher dN / dS ratio for genes encoding  
423 predicted effector proteins (Table 4), in agreement with the general observation that effector-  
424 encoding genes are fast-evolving. For *Z. tritici* only we report that effector-encoding genes are  
425 more likely to have a dN / dS > 1. For *Z. ardabiliae*, we only find 15 genes under positive  
426 selection, and none in effector-encoding candidate genes.

427         We next performed a PFAM domain enrichment analysis for the positively selected  
428 genes with a predicted function to address if some functional domains are significantly  
429 enriched in this set of genes (FDR < 0.05) (Table S5). The majority of genes encode proteins of  
430 unknown function, however among the functionally characterized proteins we find a gene  
431 encoding a regulator of chromosome condensation that was previously described to be  
432 functionally relevant for virulence in *Z. tritici* (Poppe *et al.* 2015). Our analyses reveal an  
433 enrichment of genes encoding proteinases, one gene encoding Lysin motifs (LysM) already  
434 described as an effector in *Z. tritici* and other fungal pathogens (de Jonge *et al.* 2010; Marshall  
435 *et al.* 2011), and one gene encoding a CFEM domain. Cystein-rich CFEM domains have been  
436 described in G-protein-coupled receptors in the rice blast pathogen *Magnaporthe oryzae*  
437 playing an important role in pathogenicity (Kulkarni *et al.* 2005). These genes provide  
438 interesting candidates for further studies of molecular determinants of host specificity in *Z.*  
439 *tritici*.

## 440 **Conclusions**

441           In this study we have used the fungal wheat pathogen *Z. tritici* to assess the patterns  
442 of selection acting on the genome, both qualitatively and quantitatively. We measure the rate of  
443 adaptation using models of distributions of fitness effects, and with polymorphism and  
444 divergence models of codon sequence evolution, we provide evidence for signatures of both  
445 positive and balancing selection in protein coding genes, as expected under arms race and  
446 trench warfare scenarios, respectively. The rate of adaptive substitutions in the plant pathogen  
447 is similar to estimates in animal species and considerably faster than corresponding estimates  
448 in plants. Notably, rates of evolution in genes encoding effector proteins are more than twice  
449 as fast as the genome average. Furthermore, our results suggest widespread occurrence of  
450 linked selection (both Hill-Robertson interference and background selection), as both the rate  
451 of adaptation and the strength of negative selection correlate with the recombination rate.  
452 Finally, we infer signatures of balancing selection and find an enrichment of genes encoding  
453 pathogenicity related functions - but not effector proteins - among detected genes. Our results  
454 thereby demonstrate that different categories of genes evolve under arms race and trench-  
455 warfare selection in this pathogen. Interestingly, we show that signatures of positive selection  
456 and balancing selection do not correlate with the presence of transposable elements as  
457 predicted in other studies. These results highlight the fundamental role of recombination and  
458 sexual reproduction in adaptive processes of rapidly evolving organisms.

## 459 **Materials and Methods**

### 460 **Re-sequencing, assembly and alignment of *Z. tritici* isolates**

461           In this study we used a geographical collection of thirteen field isolates of *Z. tritici*  
462 isolated from infected leaves of bread wheat (*Triticum aestivum*) (Table S1). Genome data of  
463 three isolates, including the reference isolate IPO323, were published previously (Goodwin *et*  
464 *al.* 2011; Stukenbrock *et al.* 2011). For the remaining ten isolates full genomes were

465 sequenced. DNA extraction was performed as previously described (Stukenbrock *et al.* 2011).  
466 Library preparation and paired end sequencing using an Illumina HiSeq2000 platform were  
467 conducted at Aros, Skejby, Denmark. Sequence data of the ten isolates has been deposited  
468 under the NCBI BioProject IDs PRJNA312067. We used SOAPdenovo2 (Luo *et al.* 2012) to  
469 construct de novo genome assemblies for each isolate independently. For each genome, the k-  
470 mer value maximizing the weighted median (N50) of contigs and scaffolds was selected.

471         Prior to generating a multiple genome alignment, we pre-processed the individual  
472 genomes of the thirteen *Z. tritici* isolates. First, we masked repetitive sequences using a library  
473 of 497 repeat families identified de novo in four *Zymoseptoria* species (Grandaubert *et al.*  
474 2015). Repeats were soft-masked using the program RepeatMasker (option -xsmall) to retained  
475 information of repeat sites in the alignment (A.F.A. Smit, R. Hubley & P. Green RepeatMasker  
476 at <http://repeatmasker.org>). Second, we filtered the genome assemblies to contain only contigs  
477 with a length  $\geq$  1 kb. Multiple genome alignments were generated by the MULTIZ program  
478 using the LASTZ pairwise aligner from the Threaded Blockset Aligner (TBA) package  
479 (Blanchette *et al.* 2004). The alignment was projected on the IPO323 reference genome using  
480 the maf\_project program from the TBA package.

## 481 **Inference of population structure**

482         In order to infer population structure, we generated genealogies of the thirteen  
483 isolates using the multiple genome alignment. We used the MafFilter program (Dutheil *et al.*  
484 2014) to compute pairwise distance matrices using maximum likelihood under a Kimura 2  
485 parameter model in 10 kb sliding windows along the chromosomes of the reference genome.  
486 For each window, a BioNJ tree was reconstructed from the distance matrices. The resulting  
487 1,850 genealogies were used to build a super tree using SDM for the generation of a distance  
488 supermatrix (Crisuolo *et al.* 2006) and FastME was used to infer a consensus tree (Lefort *et*  
489 *al.* 2015). We used the program ADMIXTURE (Alexander *et al.* 2009) (software using the —  
490 haploid='\*' option) to estimate the number of ancestral populations based on single nucleotide

491 polymorphism data. Filtered biallelic variants were exported as PLINK files using MafFilter  
492 (Dutheil *et al.* 2014). A cross-validation procedure was conducted as described in the manual  
493 of the ADMIXTURE in order to determine the optimal number of partitions. We further  
494 assessed the effect of linkage by removing SNPs with an R<sup>2</sup> value higher than 0.1 with any  
495 other SNP in windows of 50 SNPs, slid by 10 SNPs, using PLINK (Chang *et al.* 2015). This  
496 filtering did not affect the conclusion of the cross-validation procedure.

#### 497 **Prediction of effector candidates**

498 Gene models from the *Z. tritici* reference strains (Grandaubert *et al.* 2015) were used  
499 to predict proteins targeted for secretion using SignalP (Petersen *et al.* 2011). Genes predicted  
500 to encode a secreted protein were further submitted to effector prediction using the EffectorP  
501 software (Sperschneider *et al.* 2016).

#### 502 **Estimation of rates of adaptation**

503 Based on the coordinates of each predicted gene model in the reference genome  
504 IPO323 (Goodwin *et al.* 2011; Grandaubert *et al.* 2015), exons were extracted from the  
505 multiple genome alignment of *Z. tritici* isolates using MafFilter (Dutheil *et al.* 2014). Complete  
506 coding sequences (CDS) were concatenated to generate individual alignments of all  
507 orthologous CDS. If one or more exons were not extracted from the alignment due to missing  
508 information, the gene was discarded from further analyses. Each complete CDS alignment was  
509 filtered according to the following criteria: (i) CDS were discarded if they contained more than  
510 5% gaps in one or more individuals, (ii) CDS with premature stop codon were likewise  
511 deleted, and (iii) only alignments comprising three or more CDS were kept. In some cases, due  
512 to indels in the genome alignment, the codon phasing of some genes was lost. This issue was  
513 overcome by refining the CDS alignment using the codon-based multiple alignment program  
514 MACSE (Ranwez *et al.* 2011). The final data set contains 9,412 gene alignments, among which  
515 7,040 contain a sequence for all 13 isolates. We further created a data set containing an

516 outgroup sequence, taken from *Z. ardabiliae*, leading to 6,767 alignments with all 13 isolates  
517 together with the outgroup sequence.

518           The CDS alignment with outgroup was used to infer the synonymous and non-  
519 synonymous divergence based on the rate of synonymous and non-synonymous substitutions.  
520 The synonymous and non-synonymous unfolded site frequency spectra (SFS) were computed,  
521 using the outgroup sequence to reconstruct the ancestral allele. To do so, we first reconstructed  
522 a BioNJ tree for each gene and fitted a codon model of evolution using maximum likelihood.  
523 Then ancestral state was inferred using the marginal reconstruction procedure of Yang (Yang *et*  
524 *al.* 1995). All calculations were performed using the BppPopStats program from the Bio++  
525 Program Suite (Guéguen *et al.* 2013). We used the Grapes program in order to estimate the  
526 distribution of fitness effects from the SFS and compute a genome wide estimate of  $\alpha$  and  $\omega_a$ ,  
527 the proportion of mutations fixed by selection and the rate of adaptive substitutions  
528 respectively (Galtier 2016). The following models were fitted and compared using Akaike's  
529 information criterion: Neutral, Gamma, Gamma-Exponential, Displaced Gamma, Scaled Beta  
530 and Bessel K. Analyses were conducted on the complete set of gene alignments, as well as on  
531 sub-datasets sorted according to whether the individual genes encoded a predicted effector  
532 protein or not. We further stratified our data set according to the local recombination rate,  
533 computed in 20 kb windows, using both the previously published genetic maps (Croll *et al.*  
534 2015) and population estimates from patterns of linkage disequilibrium (Stukenbrock &  
535 Dutheil 2017). We discretized the observed distributions of both  $r$  and  $\rho$  in 41 and 45  
536 categories, respectively, using the cut2 command from the Hmisc R package in order to have  
537 similar number of genes in each category (comprising between 247 and 258 genes for  $\rho$ , and  
538 between 67 and 1,323 genes for  $r$ , the largest value being obtained for genes with  $r = 0$ ). For  
539 each gene sets, 100 bootstrap replicates were generated by sampling genes randomly in each  
540 category. Genes in each replicate were concatenated and the Grapes program run with the  
541 GammaExpo distribution of fitness effect (Galtier 2016). For each recombination category, the

542 mean estimates of  $\alpha$  and  $\omega_a$ , as well as the standard error over the 100 replicates, were  
543 computed.

#### 544 **Genome-wide analysis of selection patterns**

545 We inferred the strength of purifying selection by computing the pN / pS ratio for  
546 each gene. Average pairwise synonymous ( $\pi_S$ ) and non-synonymous ( $\pi_N$ ) nucleotide diversity  
547 were computed for each genes, and divided by the average number of synonymous (NS) and  
548 non-synonymous (NN) positions, respectively, in order to compute the pN / pS ratio as ( $\pi_N /$   
549 NN) / ( $\pi_S / NS$ ). We compared the strength of purifying selection of each gene to several  
550 variables, after discarding 6 genes with pN / pS greater than one, as they might be under  
551 positive selection. Local recombination rate in 20 kb windows was obtained from Croll et al  
552 (Croll *et al.* 2015), and averaged over the two crosses. Population recombination rates ( $\rho$ ) in  
553 the same 20 kb windows were computed as in (Stukenbrock & Dutheil 2017). Each gene was  
554 assigned a recombination rate based on the window(s) it overlap with, using a weighted  
555 average in case it overlap with multiple windows. Local protein coding site and TE densities  
556 were computed as the proportion of coding sites in a window starting x kb upstream and  
557 ending x kb downstream each gene. We compared different estimations for x = 10, 20, 50 or  
558 100 kb (see Supplementary Data). For the density of coding sites, we find very little influence  
559 of the window size, with a unimodal distribution around ~50%. We therefore selected the  
560 intermediate x = 50 kb. The density of TEs showed a large pick at 0 for low values of x. We  
561 therefore selected x = 100 kb in order to get a unimodal distribution. GC content at third codon  
562 position (GC3) and protein length were also recorded. Expression levels were calculated from  
563 (Kellner *et al.* 2014). The mean expression level was computed as the maximum value  
564 observed for the gene in axenic culture or plant infection, each averaged over three biological  
565 replicates. Genes located on accessory chromosomes were labeled as “dispensable”.  
566 Correlation and distribution comparison of the pN / pS ratio with each explanatory variable

567 were performed using rank-based tests (Kendall correlation and Wilcoxon test), as  
568 implemented in the R statistical software.

### 569 **Estimation of codon usage in *Z. tritici***

570 We selected the 10% *Z. tritici* most expressed genes and computed the relative  
571 synonymous codon usage of every codons (Sharp *et al.* 1986). Analyses were conducted using  
572 the 'uco' function of the seqinr package for R (Charif *et al.* 2005).

### 573 **Model of codon sequence evolution**

574 We used all 9,412 filtered CDS alignments to reconstruct genealogies for the  
575 individual genes using PhyML (model HKY85) (Guindon & Gascuel 2003). To investigate  
576 patterns of selection and infer the role of positive selection on adaptive gene evolution, the  
577 program CodeML from the PAML package was used (Yang 2007) with the filtered multiple  
578 CDS alignments and the corresponding phylogenetic trees as inputs. CodeML allows inference  
579 of selection and evolutionary rates by calculating the parameter  $\omega$ , the ratio of non-  
580 synonymous to synonymous rates (dN/dS) for each gene. More specifically, we compared site  
581 models that allow  $\omega$  to vary among codons in the protein (Nielsen & Yang 1998). The models  
582 used in this study include the nearly neutral (M1a), positive selection (M2a), beta& $\omega$  (M8) and  
583 beta& $\omega=1$  (M8a) models. A likelihood ratio test (LRT) was used to compare the fit of null  
584 models and alternative models, and the significance of the LRT statistic was determined using  
585 a  $\chi^2$  distribution. The first LRT tests for the occurrence of sites under positive selection by  
586 comparing the M1a and M2a models. In the model M1a sites can be under purifying selection  
587 ( $0 < \omega < 1$ ) and evolve by neutral evolution ( $\omega = 1$ ) while the M2a model allows for some sites  
588 to be under positive selection ( $\omega > 1$ ). The second LRT compares the M8a and M8 models,  
589 where in M8 a discretized beta distribution for  $\omega$  (limited to the interval [0,1]) and an  
590 additional category of sites with  $\omega_s > 1$ . M8a is obtained by constraining  $\omega_s > 1$  setting  
591 (Swanson *et al.* 2003). By allowing for a wider range of strength of purifying selection, the M8

592 models are more biologically realistic. They may suffer, however, of the same issue than the  
593 M7-M8 LRT, which was shown to display an increased false discovery rate compared to the  
594 M1a-M2a comparison (Anisimova *et al.* 2001). We corrected for multiple testing and a false  
595 discovery rate of 1% was used for the detection of genes under positive selection (Benjamini &  
596 Hochberg 1995). Only genes significant for both tests were considered as genes evolving under  
597 positive selection (787 out of 9,412 genes analyzed).

598         To address divergent adaptation, we compared gene evolution among four closely  
599 related *Zymoseptoria* species. In a previous study we defined the core proteome of *Z. tritici*, *Z.*  
600 *ardabiliae*, *Z. brevis* and *Z. pseudotritici* comprising 7,786 orthologous genes (Grandaubert *et*  
601 *al.* 2015). We generated alignments of the corresponding coding sequences using the MACSE  
602 sequence aligner (Ranwez *et al.* 2011) and used CodeML with a branch model that allows  $\omega$  to  
603 vary among branches of the phylogeny (Yang & Nielsen 1998). As input we applied a non-  
604 rooted tree of the four *Zymoseptoria* species as published in (Stukenbrock *et al.* 2012). Branch  
605 lengths were re-estimated for each gene by CodeML.

## 606 **Simulation with recombination**

607         We used the coalevol program in order to simulate codon alignments in the presence  
608 of recombination (Arenas & Posada 2014). We used a haploid effective population size of  
609 10,000 (option -e10000 1), a one year generation time (option -/1), one parameter for relative  
610 transition vs. transversion rate, set to 2 (option -v1 2), a Goldman-Yang model of codon  
611 evolution, with 4 omega classes, in equal proportion and set to 0, 0.33, 0.66 and 1.0,  
612 respectively (option -m2 4 0.0 0.25 0.33 0.25 0.66 0.25 1). Two mutation rates were tested,  
613  $1 \cdot 10^{-5}$  and  $1 \cdot 10^{-6}$  (option -u). One set of simulations was conducted without recombination (-r  
614 0.0), and for others a fixed number of recombination events was used, equal to 1, 2, 5, 10, 30  
615 or 50 (option -w). Protein length was set to 100, 500, 1,000 or 2,000 codon, for 13 and 30  
616 sequence (-s option). Thirty replicates were generated for each parameter combination, and a  
617 single phylogenetic tree was inferred using maximum likelihood on the resulting nucleotide



618 aligned, with identical parameters to the real data analysis. M1a and M2a models were then  
619 fitted using the estimated tree as input with CodeML. CodeML output was parsed using  
620 BioPython (Cock *et al.* 2009).

## 621 **Functional enrichment analysis**

622 PFAM domains were extracted from Interproscan results from (Grandaubert *et al.*  
623 2015). Only domain hits with e-values lower than  $1.10^{-5}$  were considered resulting in 10,026  
624 domains present in 7,343 genes. Enrichment tests were performed based on contingency tables,  
625 counting the number of genes containing the domain and the number of genes which do not  
626 contain it, for both the complete proteome and a given set of candidates to test. A  $\chi^2$  test was  
627 performed to assess significance.

## 628 **Gene cluster analysis**

629 To analyze the distribution of genes under positive selection, we considered two  
630 genes separated by less than 5,000 bp to be clustered and assessed the probability of such  
631 clusters under a random distribution of genes along the chromosomes. To do so on a genome-  
632 wide scale, we calculated the probability to obtain clusters encompassing from two to ten  
633 genes under positive selection when these genes are randomly distributed across all gene  
634 coordinates. Based on 10,000 random permutations, it appeared that only clusters containing  
635 more than three genes were significant at the 5% level.

## 636 **Association between positive selection and effector-encoding genes**

637 To test whether effector-encoding genes are more likely to be under positive  
638 selection, we fitted linear models with (1)  $dN / dS$  and (2)  $dN / dS > 1$  as response variables,  
639 and whether the gene was predicted to encode an effector protein in *Z. tritici* as an explanatory  
640 variable. Models were fitted independently for each branch of the four species phylogeny. A  
641 binary logistic regression was fitted in order to predict the occurrence of genes under positive

642 selection. For model (1), residues were normalized using a Box-Cox transform as implemented  
643 in the MASS package for the R statistical software. An ordinary least square fit was then  
644 obtained using the ols function of the rms package for R (Harrell 2015), using the robcov  
645 function to obtain robust estimates of the size effects and associated p-values. For model (2),  
646 the lrm function of the rms package was used to fit the binary logistic regression model,  
647 together with the robcov function to get robust estimates.

## 648 **Authors' contributions**

649 JD and EHS conceived and planned the experiments. JG and JD established the  
650 computational framework and analyzed the data. All authors contributed to the interpretation  
651 of data and wrote the manuscript. All authors read and approved the final manuscript.

## 652 **Acknowledgements**

653 The authors thank Nicolas Galtier and Thomas Bataillon for helpful discussion. The  
654 study was funded by a Max Planck fellowship and a personal grant from the State of  
655 Schleswig-Holstein, Germany both to EHS. This work was supported by the German Research  
656 Foundation (Deutsche Forschungsgemeinschaft), within the priority programs (SPP) 1819 and  
657 1590.

## 658 **Competing interests:**

659 The authors declare that they have no competing interests.

## 660 **References**

- Alexander, D.H., Novembre, J. & Lange, K. (2009). Fast model-based estimation of ancestry in unrelated individuals. *Genome Res.*, 19, 1655–1664.
- André, I., Potocki-Véronèse, G., Barbe, S., Moulis, C. & Remaud-Siméon, M. (2014). CAZyme discovery and design for sweet dreams. *Curr Opin Chem Biol*, 19, 17–24.

- Anisimova, M., Bielawski, J.P. & Yang, Z. (2001). Accuracy and power of the likelihood ratio test in detecting adaptive molecular evolution. *Mol. Biol. Evol.*, 18, 1585–1592.
- Anisimova, M., Nielsen, R. & Yang, Z. (2003). Effect of recombination on the accuracy of the likelihood method for detecting positive selection at amino acid sites. *Genetics*, 164, 1229–1236.
- Arenas, M. & Posada, D. (2014). Simulation of genome-wide evolution under heterogeneous substitution models and complex multispecies coalescent histories. *Mol. Biol. Evol.*, 31, 1295–1301.
- Benjamini, Y. & Hochberg, Y. (1995). Controlling the false discovery rate: a practical and powerful approach to multiple testing. *Journal of the Royal Statistical Society. Series B (Methodological)*, 57, 289–300.
- Birdsell, J.A. (2002). Integrating genomics, bioinformatics, and classical genetics to study the effects of recombination on genome evolution. *Mol. Biol. Evol.*, 19, 1181–1197.
- Blanchette, M., Kent, W.J., Riemer, C., Elnitski, L., Smit, A.F.A., Roskin, K.M., *et al.* (2004). Aligning multiple genomic sequences with the threaded blockset aligner. *Genome Res.*, 14, 708–715.
- Campos, J.L., Halligan, D.L., Haddrill, P.R. & Charlesworth, B. (2014). The relation between recombination rate and patterns of molecular evolution and variation in *Drosophila melanogaster*. *Mol. Biol. Evol.*, 31, 1010–1028.
- Castellano, D., Coronado-Zamora, M., Campos, J.L., Barbadilla, A. & Eyre-Walker, A. (2016). Adaptive Evolution Is Substantially Impeded by Hill-Robertson Interference in *Drosophila*. *Mol. Biol. Evol.*, 33, 442–455.
- Chang, C.C., Chow, C.C., Tellier, L.C., Vattikuti, S., Purcell, S.M. & Lee, J.J. (2015). Second-generation PLINK: rising to the challenge of larger and richer datasets. *Gigascience*, 4, 7.
- Charif, D., Thioulouse, J., Lobry, J.R. & Perrière, G. (2005). Online synonymous codon usage analyses with the ade4 and seqinR packages. *Bioinformatics*, 21, 545–547.

- Charlesworth, B., Morgan, M.T. & Charlesworth, D. (1993). The effect of deleterious mutations on neutral molecular variation. *Genetics*, 134, 1289–1303.
- Cock, P.J.A., Antao, T., Chang, J.T., Chapman, B.A., Cox, C.J., Dalke, A., *et al.* (2009). Biopython: freely available Python tools for computational molecular biology and bioinformatics. *Bioinformatics*, 25, 1422–1423.
- Criscuolo, A., Berry, V., Douzery, E.J.P. & Gascuel, O. (2006). SDM: a fast distance-based approach for (super) tree building in phylogenomics. *Syst. Biol.*, 55, 740–755.
- Croll, D., Lendenmann, M.H., Stewart, E. & McDonald, B.A. (2015). The Impact of Recombination Hotspots on Genome Evolution of a Fungal Plant Pathogen. *Genetics*, 201, 1213–1228.
- Delmas, C.E.L., Dussert, Y., Delière, L., Couture, C., Mazet, I.D., Richart Cervera, S., *et al.* (2017). Soft selective sweeps in fungicide resistance evolution: recurrent mutations without fitness costs in grapevine downy mildew. *Mol. Ecol.*, 26, 1936–1951.
- Drummond, D.A., Raval, A. & Wilke, C.O. (2006). A single determinant dominates the rate of yeast protein evolution. *Mol. Biol. Evol.*, 23, 327–337.
- Duret, L. (2002). Evolution of synonymous codon usage in metazoans. *Curr. Opin. Genet. Dev.*, 12, 640–649.
- Duret, L. & Mouchiroud, D. (1999). Expression pattern and, surprisingly, gene length shape codon usage in *Caenorhabditis*, *Drosophila*, and *Arabidopsis*. *Proc. Natl. Acad. Sci. U.S.A.*, 96, 4482–4487.
- Dutheil, J.Y., Gaillard, S. & Stukenbrock, E.H. (2014). MafFilter: a highly flexible and extensible multiple genome alignment files processor. *BMC Genomics*, 15, 53.
- Dutheil, J.Y., Mannhaupt, G., Schweizer, G., Sieber, C.M.K., Münsterkötter, M., Güldener, U., *et al.* (2016). A Tale of Genome Compartmentalization: The Evolution of Virulence Clusters in Smut Fungi. *Genome Biol Evol*, 8, 681–704.
- Ellegren, H. & Galtier, N. (2016). Determinants of genetic diversity. *Nat. Rev. Genet.*, 17, 422–433.

- Eyre-Walker, A. & Keightley, P.D. (2007). The distribution of fitness effects of new mutations. *Nat. Rev. Genet.*, 8, 610–618.
- Galtier, N. (2016). Adaptive Protein Evolution in Animals and the Effective Population Size Hypothesis. *PLoS Genet.*, 12, e1005774.
- Goodwin, S.B., M’barek, S.B., Dhillon, B., Wittenberg, A.H.J., Crane, C.F., Hane, J.K., *et al.* (2011). Finished genome of the fungal wheat pathogen *Mycosphaerella graminicola* reveals dispensome structure, chromosome plasticity, and stealth pathogenesis. *PLoS Genet.*, 7, e1002070.
- Gossmann, T.I., Song, B.-H., Windsor, A.J., Mitchell-Olds, T., Dixon, C.J., Kapralov, M.V., *et al.* (2010). Genome wide analyses reveal little evidence for adaptive evolution in many plant species. *Mol. Biol. Evol.*, 27, 1822–1832.
- Grandaubert, J., Bhattacharyya, A. & Stukenbrock, E.H. (2015). RNA-seq-Based Gene Annotation and Comparative Genomics of Four Fungal Grass Pathogens in the Genus *Zymoseptoria* Identify Novel Orphan Genes and Species-Specific Invasions of Transposable Elements. *G3 (Bethesda)*, 5, 1323–1333.
- Guéguen, L., Gaillard, S., Boussau, B., Gouy, M., Groussin, M., Rochette, N.C., *et al.* (2013). Bio++: Efficient Extensible Libraries and Tools for Computational Molecular Evolution. *Mol. Biol. Evol.*
- Guindon, S. & Gascuel, O. (2003). A simple, fast, and accurate algorithm to estimate large phylogenies by maximum likelihood. *Syst. Biol.*, 52, 696–704.
- Habig, M., Quade, J. & Stukenbrock, E.H. (2017). Forward Genetics Approach Reveals Host Genotype-Dependent Importance of Accessory Chromosomes in the Fungal Wheat Pathogen *Zymoseptoria tritici*. *MBio*, 8.
- Harrell, F.E. (2015). *Regression Modeling Strategies*. Springer Series in Statistics. Springer International Publishing, Cham.
- Hayes, L.E., Sackett, K.E., Anderson, N.P., Flowers, M.D. & Mundt, C.C. (2015). Evidence of Selection for Fungicide Resistance in *Zymoseptoria tritici* Populations on Wheat in Western Oregon. *Plant Disease*, 100, 483–489.

- Hill, W.G. & Robertson, A. (1966). The effect of linkage on limits to artificial selection. *Genet. Res.*, 8, 269–294.
- Howlett, B.J. (2006). Secondary metabolite toxins and nutrition of plant pathogenic fungi. *Curr. Opin. Plant Biol.*, 9, 371–375.
- Huard-Chauveau, C., Percepied, L., Debieu, M., Rivas, S., Kroj, T., Kars, I., *et al.* (2013). An atypical kinase under balancing selection confers broad-spectrum disease resistance in *Arabidopsis*. *PLoS Genet.*, 9, e1003766.
- de Jonge, R., van Esse, H.P., Kombrink, A., Shinya, T., Desaki, Y., Bours, R., *et al.* (2010). Conserved fungal LysM effector Ecp6 prevents chitin-triggered immunity in plants. *Science*, 329, 953–955.
- Kellner, R., Bhattacharyya, A., Poppe, S., Hsu, T.Y., Brem, R.B. & Stukenbrock, E.H. (2014). Expression profiling of the wheat pathogen *Zymoseptoria tritici* reveals genomic patterns of transcription and host-specific regulatory programs. *Genome Biol Evol*, 6, 1353–1365.
- Kulkarni, R.D., Thon, M.R., Pan, H. & Dean, R.A. (2005). Novel G-protein-coupled receptor-like proteins in the plant pathogenic fungus *Magnaporthe grisea*. *Genome Biol.*, 6, R24.
- Lefort, V., Desper, R. & Gascuel, O. (2015). FastME 2.0: A Comprehensive, Accurate, and Fast Distance-Based Phylogeny Inference Program. *Mol. Biol. Evol.*, 32, 2798–2800.
- Liao, B.-Y., Scott, N.M. & Zhang, J. (2006). Impacts of gene essentiality, expression pattern, and gene compactness on the evolutionary rate of mammalian proteins. *Mol. Biol. Evol.*, 23, 2072–2080.
- Lo Presti, L., Lanver, D., Schweizer, G., Tanaka, S., Liang, L., Tollot, M., *et al.* (2015). Fungal effectors and plant susceptibility. *Annu Rev Plant Biol*, 66, 513–545.
- Luo, R., Liu, B., Xie, Y., Li, Z., Huang, W., Yuan, J., *et al.* (2012). SOAPdenovo2: an empirically improved memory-efficient short-read de novo assembler. *Gigascience*, 1, 18.
- Marais, G. & Charlesworth, B. (2003). Genome evolution: recombination speeds up adaptive evolution. *Curr. Biol.*, 13, R68-70.

- Marshall, R., Kombrink, A., Motteram, J., Loza-Reyes, E., Lucas, J., Hammond-Kosack, K.E., *et al.* (2011). Analysis of two in planta expressed LysM effector homologs from the fungus *Mycosphaerella graminicola* reveals novel functional properties and varying contributions to virulence on wheat. *Plant Physiol.*, 156, 756–769.
- Möller, M. & Stukenbrock, E.H. (2017). Evolution and genome architecture in fungal plant pathogens. *Nat. Rev. Microbiol.*, 15, 756–771.
- Nielsen, R. & Yang, Z. (1998). Likelihood models for detecting positively selected amino acid sites and applications to the HIV-1 envelope gene. *Genetics*, 148, 929–936.
- Nordborg, M., Charlesworth, B. & Charlesworth, D. (1996). The effect of recombination on background selection. *Genet. Res.*, 67, 159–174.
- Petersen, T.N., Brunak, S., Heijne, G. von & Nielsen, H. (2011). SignalP 4.0: discriminating signal peptides from transmembrane regions. *Nature Methods*, 8, 785–786.
- Poppe, S., Dorsheimer, L., Happel, P. & Stukenbrock, E.H. (2015). Rapidly Evolving Genes Are Key Players in Host Specialization and Virulence of the Fungal Wheat Pathogen *Zymoseptoria tritici* (*Mycosphaerella graminicola*). *PLoS Pathog.*, 11, e1005055.
- Raffaele, S., Farrer, R.A., Cano, L.M., Studholme, D.J., MacLean, D., Thines, M., *et al.* (2010). Genome evolution following host jumps in the Irish potato famine pathogen lineage. *Science*, 330, 1540–1543.
- Raffaele, S. & Kamoun, S. (2012). Genome evolution in filamentous plant pathogens: why bigger can be better. *Nat Rev Micro*, 10, 417–430.
- Ranwez, V., Harispe, S., Delsuc, F. & Douzery, E.J.P. (2011). MACSE: Multiple Alignment of Coding SEquences accounting for frameshifts and stop codons. *PLoS ONE*, 6, e22594.
- Romiguier, J., Gayral, P., Ballenghien, M., Bernard, A., Cahais, V., Chenuil, A., *et al.* (2014). Comparative population genomics in animals uncovers the determinants of genetic diversity. *Nature*, 515, 261–263.
- Schotanus, K., Soyer, J.L., Connolly, L.R., Grandaubert, J., Happel, P., Smith, K.M., *et al.* (2015). Histone modifications rather than the novel regional centromeres of

- Zymoseptoria tritici distinguish core and accessory chromosomes. *Epigenetics Chromatin*, 8, 41.
- Sharp, P.M., Tuohy, T.M. & Mosurski, K.R. (1986). Codon usage in yeast: cluster analysis clearly differentiates highly and lowly expressed genes. *Nucleic Acids Res.*, 14, 5125–5143.
- Sperschneider, J., Gardiner, D.M., Dodds, P.N., Tini, F., Covarelli, L., Singh, K.B., *et al.* (2016). EffectorP: predicting fungal effector proteins from secretomes using machine learning. *New Phytol.*, 210, 743–761.
- Stahl, E.A., Dwyer, G., Mauricio, R., Kreitman, M. & Bergelson, J. (1999). Dynamics of disease resistance polymorphism at the Rpm1 locus of Arabidopsis. *Nature*, 400, 667–671.
- Stergiopoulos, I., van den Burg, H.A., Okmen, B., Beenen, H.G., van Liere, S., Kema, G.H.J., *et al.* (2010). Tomato Cf resistance proteins mediate recognition of cognate homologous effectors from fungi pathogenic on dicots and monocots. *Proc. Natl. Acad. Sci. U.S.A.*, 107, 7610–7615.
- Stukenbrock, E.H., Banke, S., Javan-Nikkhah, M. & McDonald, B.A. (2007). Origin and domestication of the fungal wheat pathogen *Mycosphaerella graminicola* via sympatric speciation. *Mol. Biol. Evol.*, 24, 398–411.
- Stukenbrock, E.H., Bataillon, T., Dutheil, J.Y., Hansen, T.T., Li, R., Zala, M., *et al.* (2011). The making of a new pathogen: insights from comparative population genomics of the domesticated wheat pathogen *Mycosphaerella graminicola* and its wild sister species. *Genome Res.*, 21, 2157–2166.
- Stukenbrock, E.H., Christiansen, F.B., Hansen, T.T., Dutheil, J.Y. & Schierup, M.H. (2012). Fusion of two divergent fungal individuals led to the recent emergence of a unique widespread pathogen species. *Proc. Natl. Acad. Sci. U.S.A.*, 109, 10954–10959.
- Stukenbrock, E.H. & Dutheil, J.Y. (2017). Fine-Scale Recombination Maps of Fungal Plant Pathogens Reveal Dynamic Recombination Landscapes and Intragenic Hotspots. *Genetics*.



- Stukenbrock, E.H., Jørgensen, F.G., Zala, M., Hansen, T.T., McDonald, B.A. & Schierup, M.H. (2010). Whole-genome and chromosome evolution associated with host adaptation and speciation of the wheat pathogen *Mycosphaerella graminicola*. *PLoS Genet.*, 6, e1001189.
- Swanson, W.J., Nielsen, R. & Yang, Q. (2003). Pervasive adaptive evolution in mammalian fertilization proteins. *Mol. Biol. Evol.*, 20, 18–20.
- Tajima, F. (1989). Statistical method for testing the neutral mutation hypothesis by DNA polymorphism. *Genetics*, 123, 585–595.
- Tellier, A., Moreno-Gámez, S. & Stephan, W. (2014). Speed of adaptation and genomic footprints of host-parasite coevolution under arms race and trench warfare dynamics. *Evolution*, 68, 2211–2224.
- Tian, D., Araki, H., Stahl, E., Bergelson, J. & Kreitman, M. (2002). Signature of balancing selection in *Arabidopsis*. *Proc. Natl. Acad. Sci. U.S.A.*, 99, 11525–11530.
- Upton, J.L., Zess, E.K., Białas, A., Wu, C.-H. & Kamoun, S. (2018). The coming of age of EvoMPMI: evolutionary molecular plant-microbe interactions across multiple timescales. *Curr. Opin. Plant Biol.*, 44, 108–116.
- Van den Ackerveken, G.F., Vossen, P. & De Wit, P.J. (1993). The AVR9 race-specific elicitor of *Cladosporium fulvum* is processed by endogenous and plant proteases. *Plant Physiol.*, 103, 91–96.
- Van Valen, L. (1973). A New Evolutionary Law. *Evol. Theory*, 1, 1–30.
- Waalwijk, C., Mendes, O., Verstappen, E.C.P., de Waard, M.A. & Kema, G.H.J. (2002). Isolation and characterization of the mating-type idiomorphs from the wheat septoria leaf blotch fungus *Mycosphaerella graminicola*. *Fungal Genet. Biol.*, 35, 277–286.
- Yang, Z. (2007). PAML 4: phylogenetic analysis by maximum likelihood. *Mol. Biol. Evol.*, 24, 1586–1591.
- Yang, Z., Kumar, S. & Nei, M. (1995). A new method of inference of ancestral nucleotide and amino acid sequences. *Genetics*, 141, 1641–1650.

Yang, Z. & Nielsen, R. (1998). Synonymous and nonsynonymous rate variation in nuclear genes of mammals. *J. Mol. Evol.*, 46, 409–418.

## 661 Tables

662 **Table 1:** Estimates of the proportion of adaptive mutation ( $\alpha$ ) under various models of  
663 distribution of fitness effects.

| Data set      | Model          | Nb. parameters | Log likelihood | AIC            | $\alpha$     | $\omega_a$   |
|---------------|----------------|----------------|----------------|----------------|--------------|--------------|
| All genes     | Neutral        | 16             | -1111.199      | 2254.398       | 0.253        | 0.031        |
| All genes     | Gamma          | 17             | -286.142       | 606.284        | 0.464        | 0.058        |
| All genes     | GammaExpo      | 19             | -229.425       | <b>496.850</b> | <b>0.352</b> | <b>0.044</b> |
| All genes     | DisplacedGamma | 18             | -286.142       | 608.284        | 0.464        | 0.058        |
| All genes     | ScaledBeta     | 18             | -273.334       | 582.669        | 0.485        | 0.060        |
| All genes     | BesselK        | 19             | -294.387       | 626.774        | 0.514        | 0.064        |
| Non-effectors | Neutral        | 16             | -1104.260      | 2240.519       | 0.252        | 0.031        |
| Non-effectors | Gamma          | 17             | -286.821       | 607.643        | 0.463        | 0.057        |
| Non-effectors | GammaExpo      | 19             | -230.221       | <b>498.442</b> | <b>0.388</b> | <b>0.048</b> |
| Non-effectors | DisplacedGamma | 18             | -286.821       | 609.643        | 0.463        | 0.057        |
| Non-effectors | ScaledBeta     | 18             | -273.687       | 583.375        | 0.458        | 0.057        |
| Non-effectors | BesselK        | 19             | -296.728       | 631.456        | 0.513        | 0.063        |
| Effectors     | Neutral        | 16             | -101.036       | 234.071        | 0.307        | 0.062        |
| Effectors     | Gamma          | 17             | -94.255        | 222.510        | 0.485        | 0.097        |
| Effectors     | GammaExpo      | 19             | -87.332        | 212.664        | 0.666        | 0.134        |
| Effectors     | DisplacedGamma | 18             | -94.684        | 225.369        | 0.492        | 0.099        |
| Effectors     | ScaledBeta     | 18             | -86.845        | <b>209.689</b> | <b>0.600</b> | <b>0.120</b> |
| 664 Effectors | BesselK        | 19             | -87.416        | 212.832        | 0.507        | 0.102        |

665 AIC: Akaike's information criterion.  $\alpha$ : proportion of adaptive substitutions,  $\omega_a$ : rate of  
666 adaptive substitutions. Values in bold indicate the best model fit for each gene set.

667

668 **Table 2:** Correlation of pN / pS with genomic factors.

| Variable                               | Effect  | P value  |
|----------------------------------------|---------|----------|
| GC3                                    | -0.2372 | <2.2E-16 |
| Expression                             | -0.3689 | <2.2E-16 |
| Protein size                           | 0.0227  | 0.0056   |
| Density of protein coding sites        | 0.0067  | 0.4127   |
| Recombination rate (cM / Mb)           | -0.0309 | 1.85E-04 |
| Population recombination rate (4.Ne.r) | -0.0394 | 1.52E-06 |
| Density of TEs                         | -0.0030 | 0.7197   |
| Effector                               | 0.0845  | 1.05E-14 |
| 669 Dispensable chromosome             | 0.2590  | 0.0162   |

670 Effects and p-values are calculated using Kendall's correlation of ranks. GC3: GC-content at  
 671 third codon positions. TEs: transposable elements.

672 **Table 3:** Genomic factors affecting the occurrence of balancing selection

| Variable                     | LRT result |         | Tajima's D |         |
|------------------------------|------------|---------|------------|---------|
|                              | Coef.      | P value | Coef.      | P value |
| Intercept                    | -1.3428    | <0.0001 | -1.4128    | <0.0001 |
| Recombination rate (cM / Mb) | 0.0012     | 0.0006  | 0.0011     | <0.0001 |
| Density of TEs               | -0.9250    | 0.0621  | 0.0504     | 0.6465  |
| Coding site density          | -0.2991    | 0.5259  | -0.0471    | 0.6768  |
| Effector                     | -0.9621    | 0.0156  | -0.1164    | 0.1239  |
| 673 Expression               | -0.3341    | <0.0001 | -0.0193    | 0.0213  |

674 LRT result: likelihood ratio test obtained from PAML analysis. Coef.: model coefficient. TEs:  
 675 transposable elements.

676 **Table 4:** Difference of dN / dS ratios between genes predicted to encode an effector protein or  
 677 not, in different branches of the species tree.

| Species                                           | Positive selection |           | dN / dS (OLS) |         | dN / dS > 1 (BLR) |         |
|---------------------------------------------------|--------------------|-----------|---------------|---------|-------------------|---------|
|                                                   | Total              | Effectors | Coef.         | P-value | Coef.             | P-value |
| <i>Z. tritici</i>                                 | 47                 | 5         | 0.4281        | 0.0000  | 2.0427            | 0.0002  |
| <i>Z. pseudotritici</i>                           | 54                 | 4         | 0.3319        | 0.0001  | 0.9290            | 0.2027  |
| <i>Z. tritici</i> – <i>pseudotritici</i> ancestor | 1149               | 41        | 1.0968        | 0.0000  | 0.3649            | 0.2592  |
| <i>Z. brevis</i>                                  | 60                 | 3         | 0.4593        | 0.0000  | 0.7492            | 0.3026  |
| 678 <i>Z. ardabiliae</i>                          | 15                 | 0         | 0.3173        | 0.0000  | -5.0216           | 0.0000  |

679 OLS: ordinary least square. BLR: binary logistic regression. Coef. : coefficient in the linear  
 680 model.

## 681 **Figures**

682 **Fig. 1:** Population structure of the thirteen *Z. tritici* isolates. A) Consensus super tree of the  
683 thirteen isolates based on 1,850 genealogies estimated in 10 kb sliding windows along the  
684 multiple genome alignment. This tree suggests the grouping of the isolates into two  
685 populations originating from Europe and Iran. B) Based on SNP data, the program  
686 ADMIXTURE estimated that the best separation of the isolates is also in two populations  
687 (k=2). However, the use of k=3 highlighted a German sub-population within the European  
688 isolates.

689 **Fig. 2:** Comparison of the estimates of A) the proportion of adaptive substitution  $\alpha$ , and B) the  
690 rate of adaptive substitution,  $\omega_a$  for genes predicted to encode effector proteins or not.  
691 Histograms (white bars), kernel density plots and box-and-whiskers charts are computed over  
692 100 bootstrap replicates in each case (see Material and Methods).

693 **Fig. 3:** Estimates of A) the proportion of adaptive substitution  $\alpha$ , and B) the rate of adaptive  
694 substitution,  $\omega_a$  as a function of the recombination rate ( $r$ ). Each point and bars represent the  
695 mean estimate and corresponding standard error for one recombination category over 100  
696 bootstrap replicates. Four models were fitted (colored curved) and corresponding Akaike's  
697 information criterion values are indicated in the right margin. Inset plots represent the same  
698 data with a logarithmic scale, the b value was set to the corresponding estimate in the third  
699 model. Confidence intervals have been omitted for clarity.

700 **Fig. 4:** Correlation of the strength of purifying selection with several genomic factors. The  
701 intensity of purifying selection is measured by the pN / pS ratio. Points represent median  
702 values and error bar the first and third quartiles of the distributions. A-F: x-axis were  
703 discretized in categories with equal point densities for clarity of visualization. Lines represent  
704 first, median and third quantile regression on non-discretized data.

705 **Fig. 5:** Patterns of selection along the genome of *Z. tritici*. Recombination rate, population  
706 recombination rate, pN / pS ratio and density of coding sites (CDS) are plotted in windows of  
707 100 kb along the thirteen essential chromosomes.

708 **Fig. 6:** Effect of recombination on the inference of positive selection. False discovery rate, as  
709 estimated from simulations under a model with neutral and purifying selection only, was  
710 plotted as a function of the number of recombination events (x-axis), length of the alignment  
711 (coloured lines), mutation rate and sample size (panels). Horizontal dash lines show the  
712 discovery rate of the real data for distinct minimum gene lengths.

713 **Fig. 7:** Distribution of Tajima's D for different gene categories. Kernel densities were fitted to  
714 the distribution of each gene's Tajima's D (x-axis and color scale), sorted per category  
715 (detected to be under balancing selection, predicted to encode an effector protein, predicted not  
716 to encode an effector protein, all genes).

## 717 **Supplementary material**

718 **Table S1:** Summary table of isolates used in this study and genome assembly statistics.

719 **Table S2:** Summary statistics of the multiple genome alignment of thirteen *Z. tritici* genomes.

720 **Table S3:** Output of the PAML analysis using codon site models for the 9,412 filtered CDS of  
721 *Z. tritici*.

722 **Table S4:** Functional enrichment analysis using PFAM domains for the 787 genes with sites  
723 under positive selection in *Z. tritici*.

724 **Table S5:** Functional enrichment analysis using PFAM domains for the genes under positive  
725 selection in four *Zymoseptoria* species.

726 **Fig. S1:** Codon usage in *Z. tritici*. Relative synonymous codon usage (RSCU) in the 10% most  
727 expressed genes of *Z. tritici*. Codon usage, according to the base type at the third position.

**A**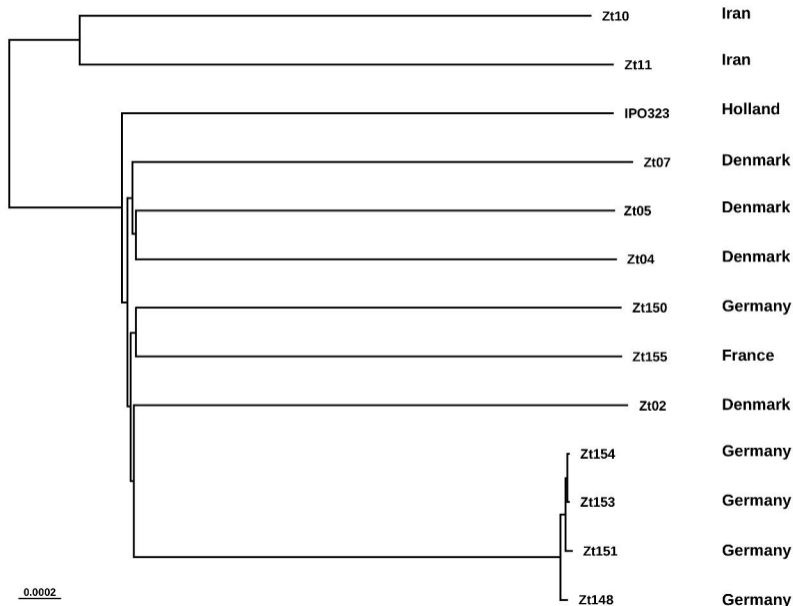**B**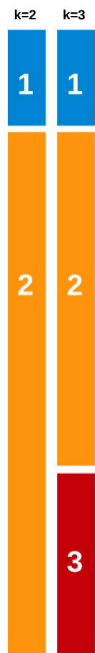

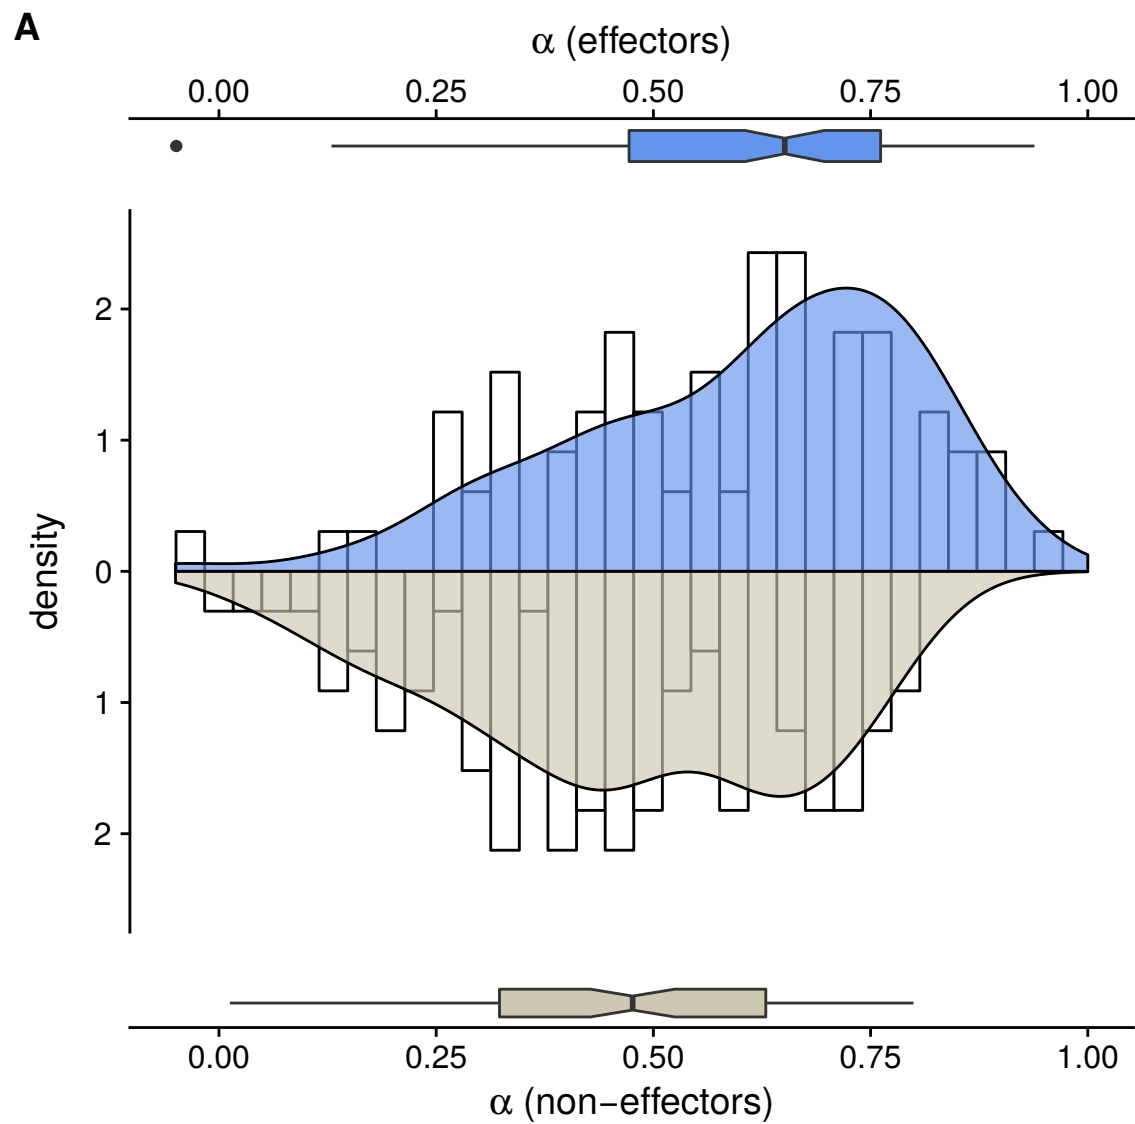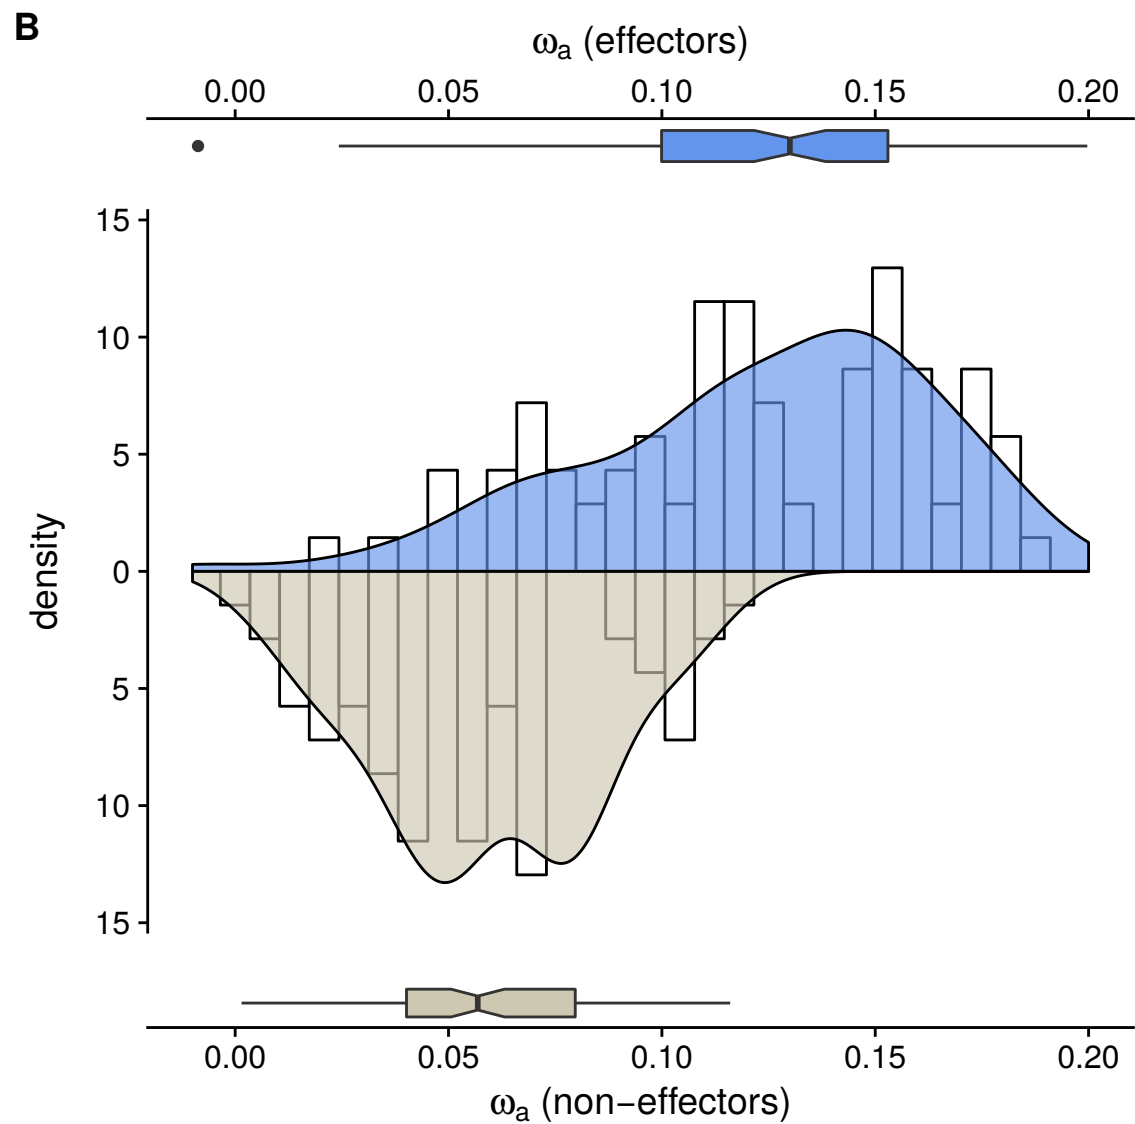

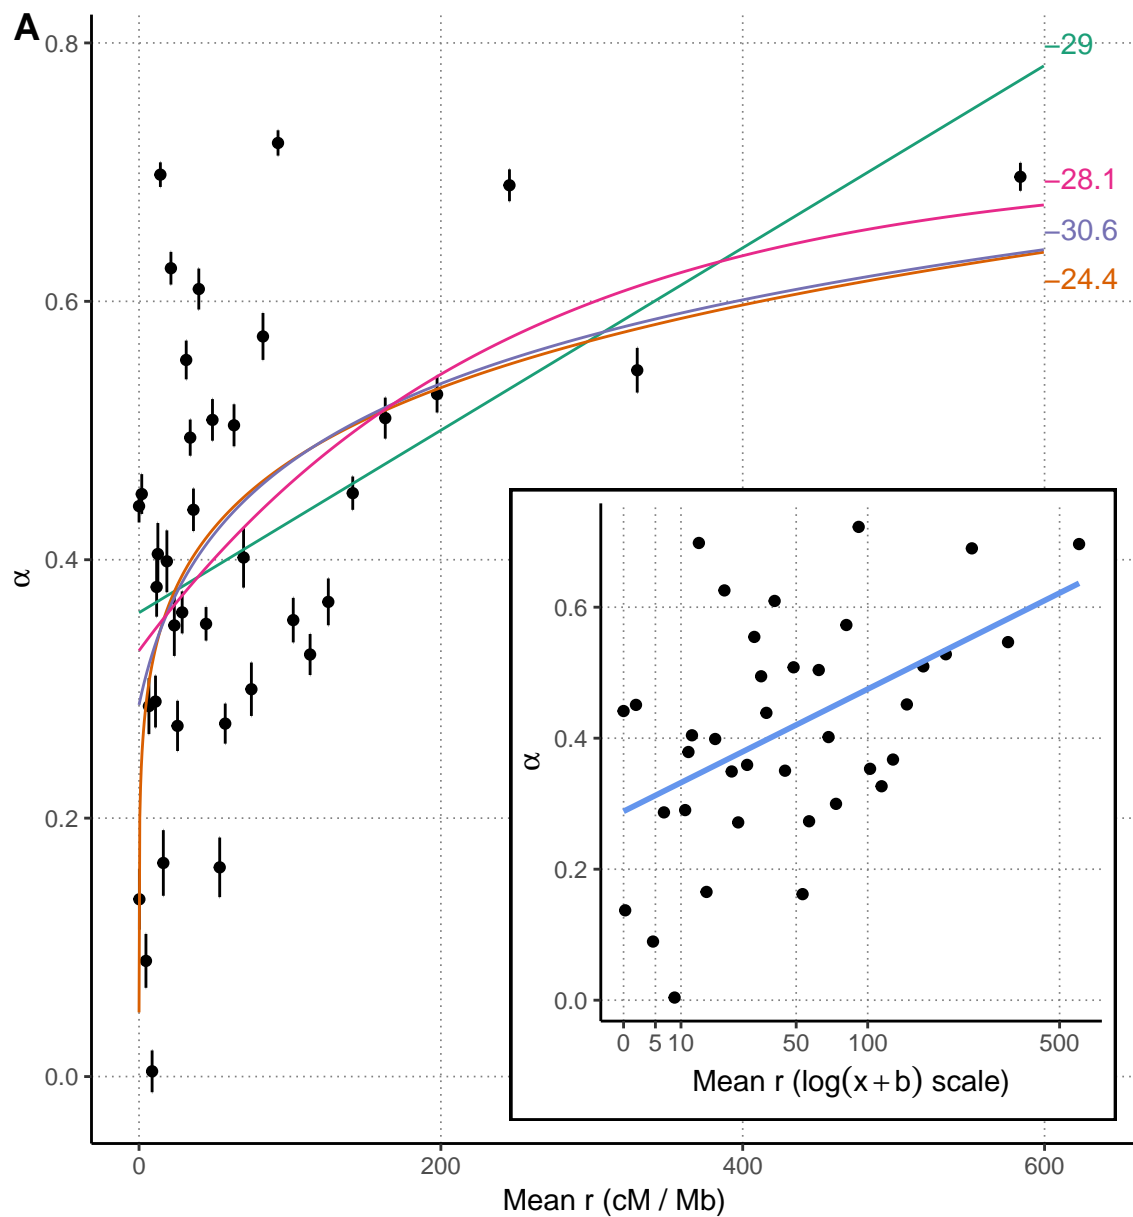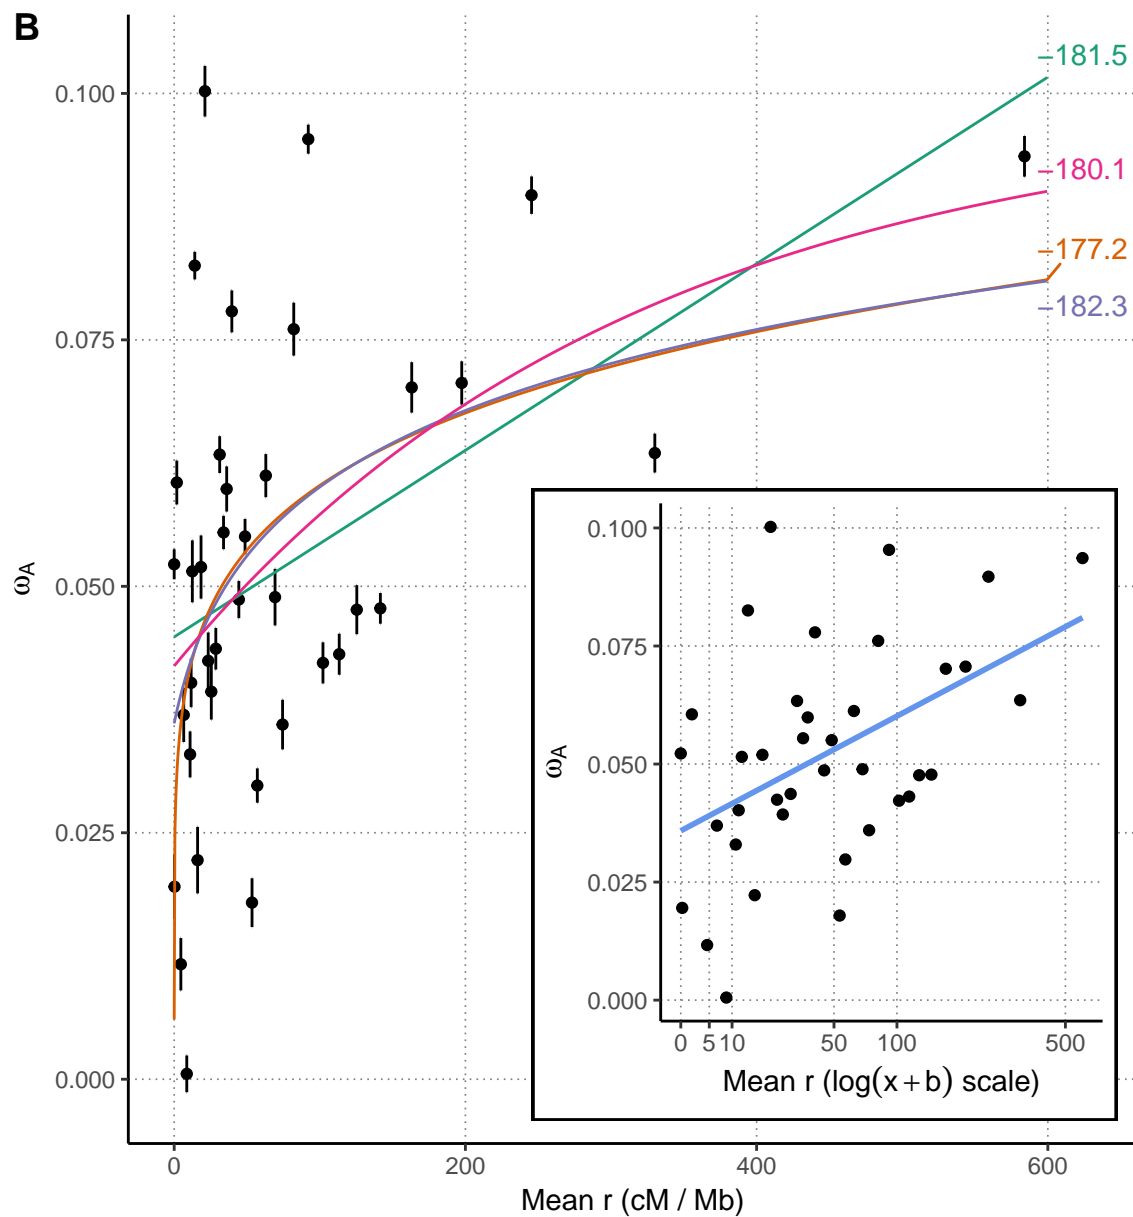

Model  $a+b.x$   $a.x^b$   $a.\log(x+b)$   $a+b.\exp(-c.x)$

Model  $a+b.x$   $a.x^b$   $a.\log(x+b)$   $a+b.\exp(-c.x)$



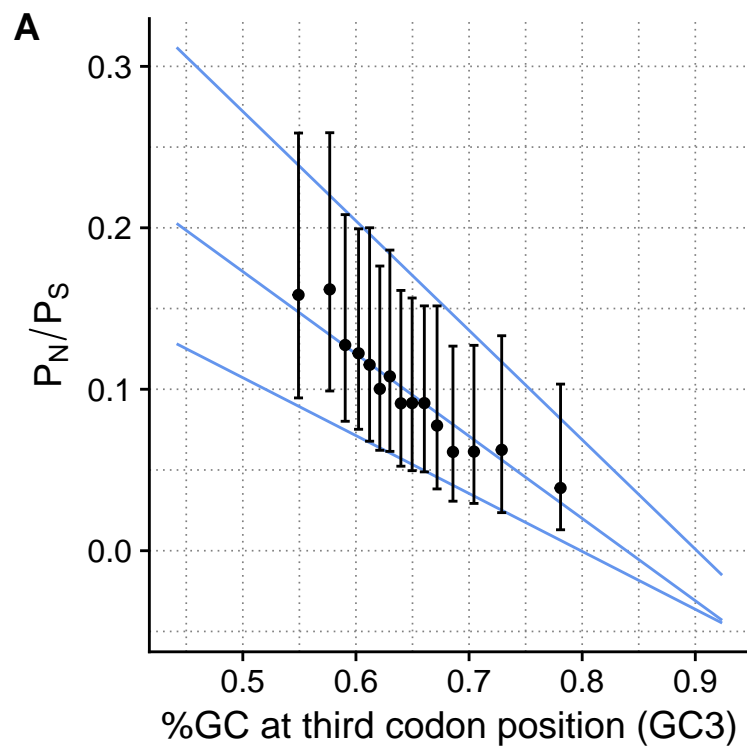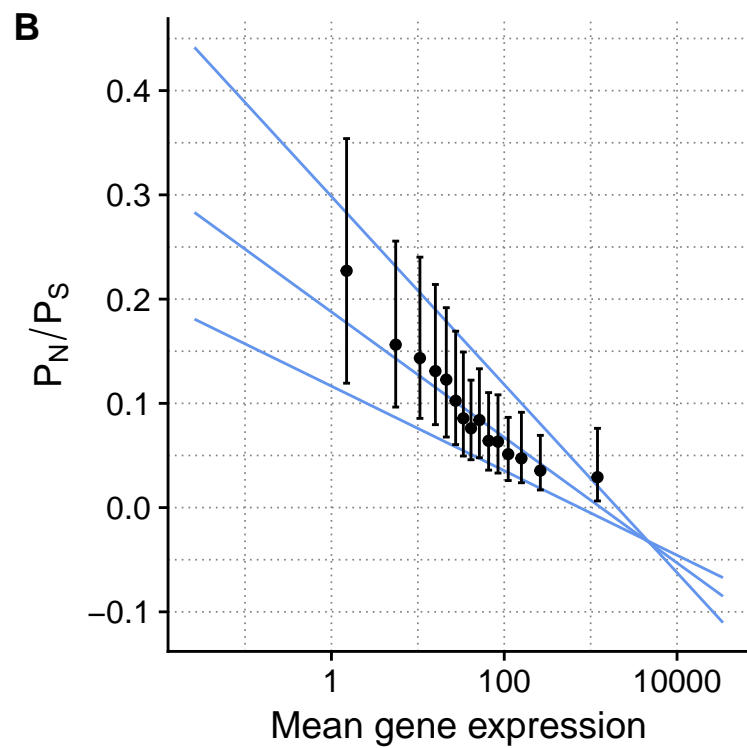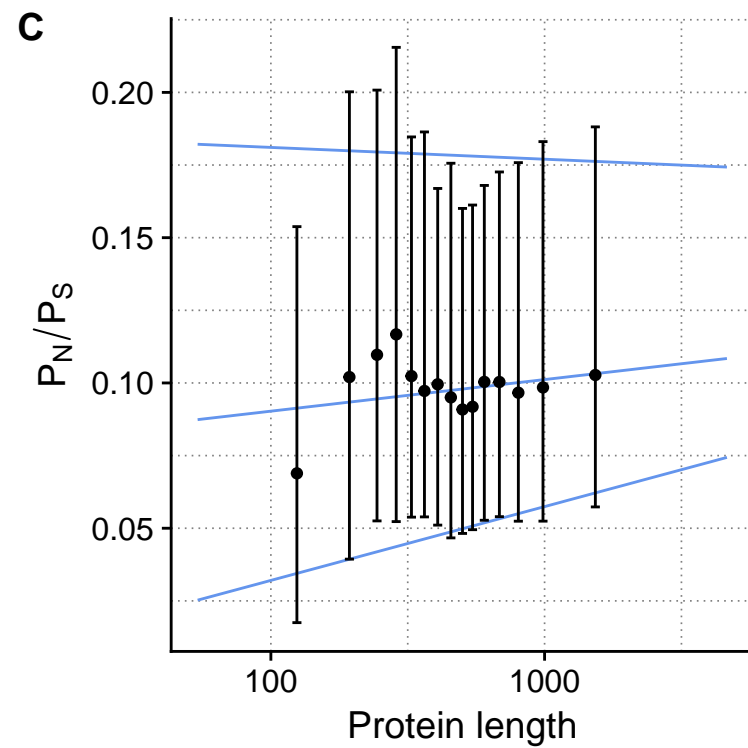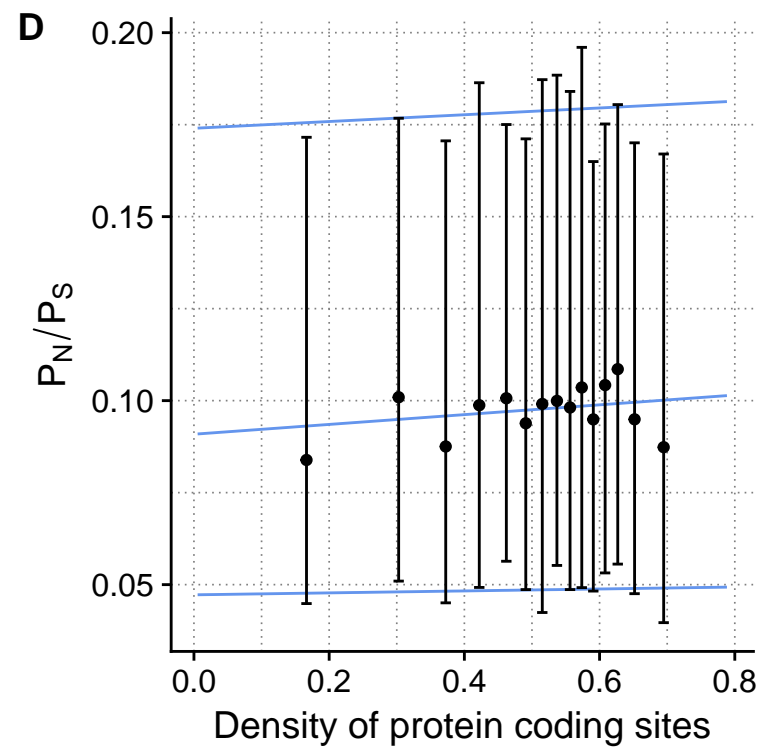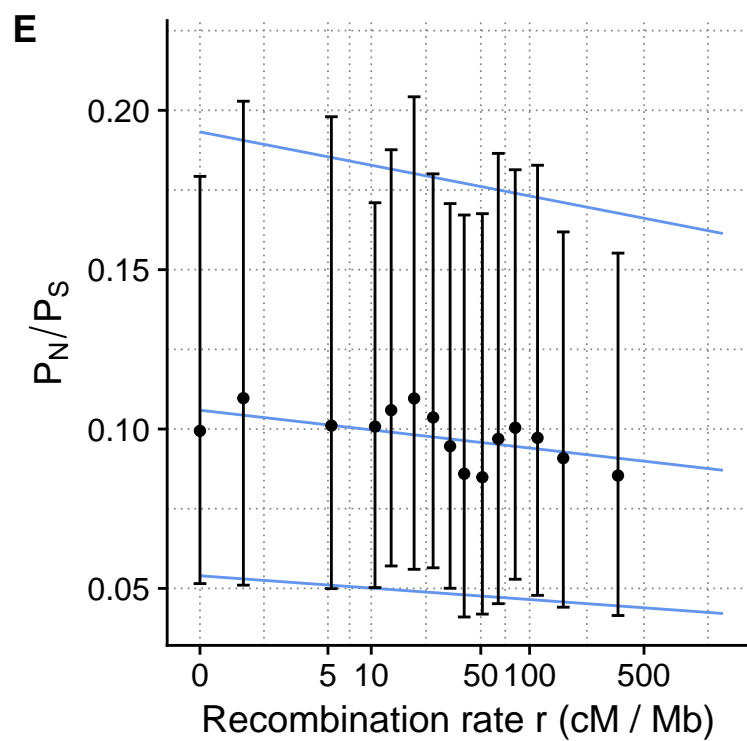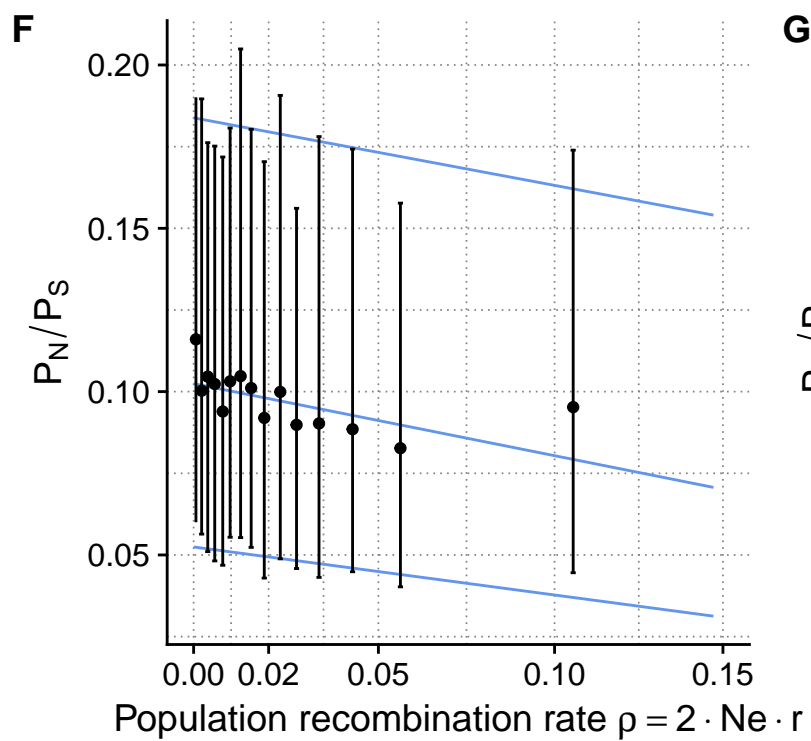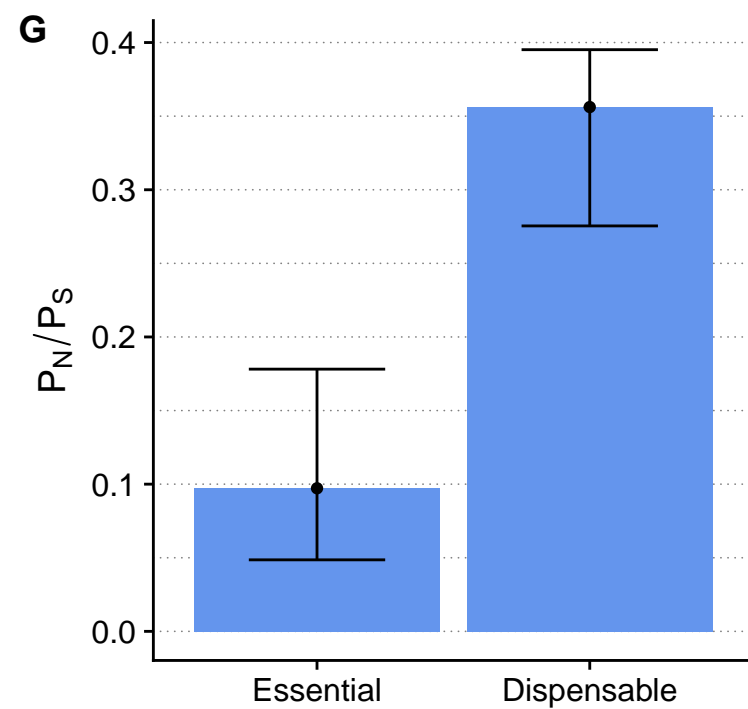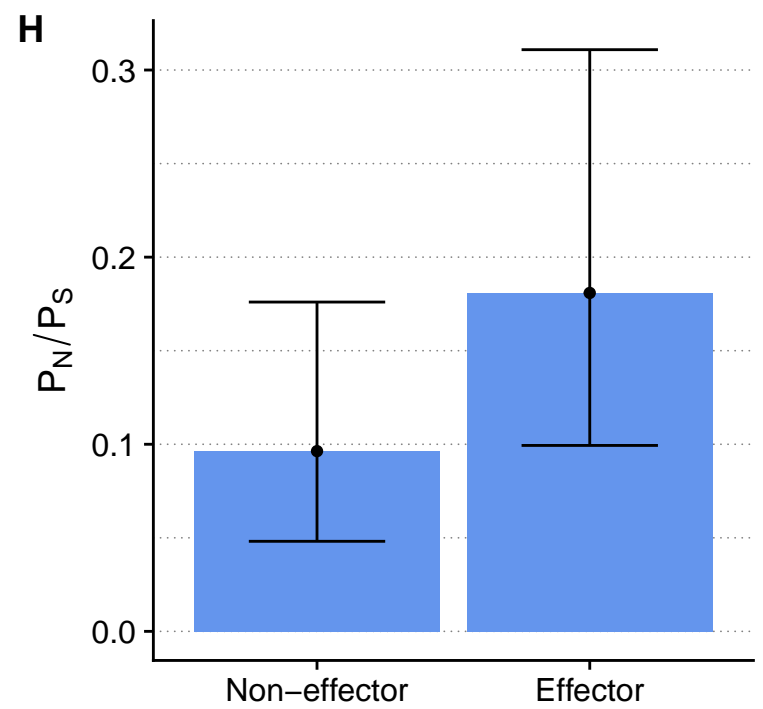

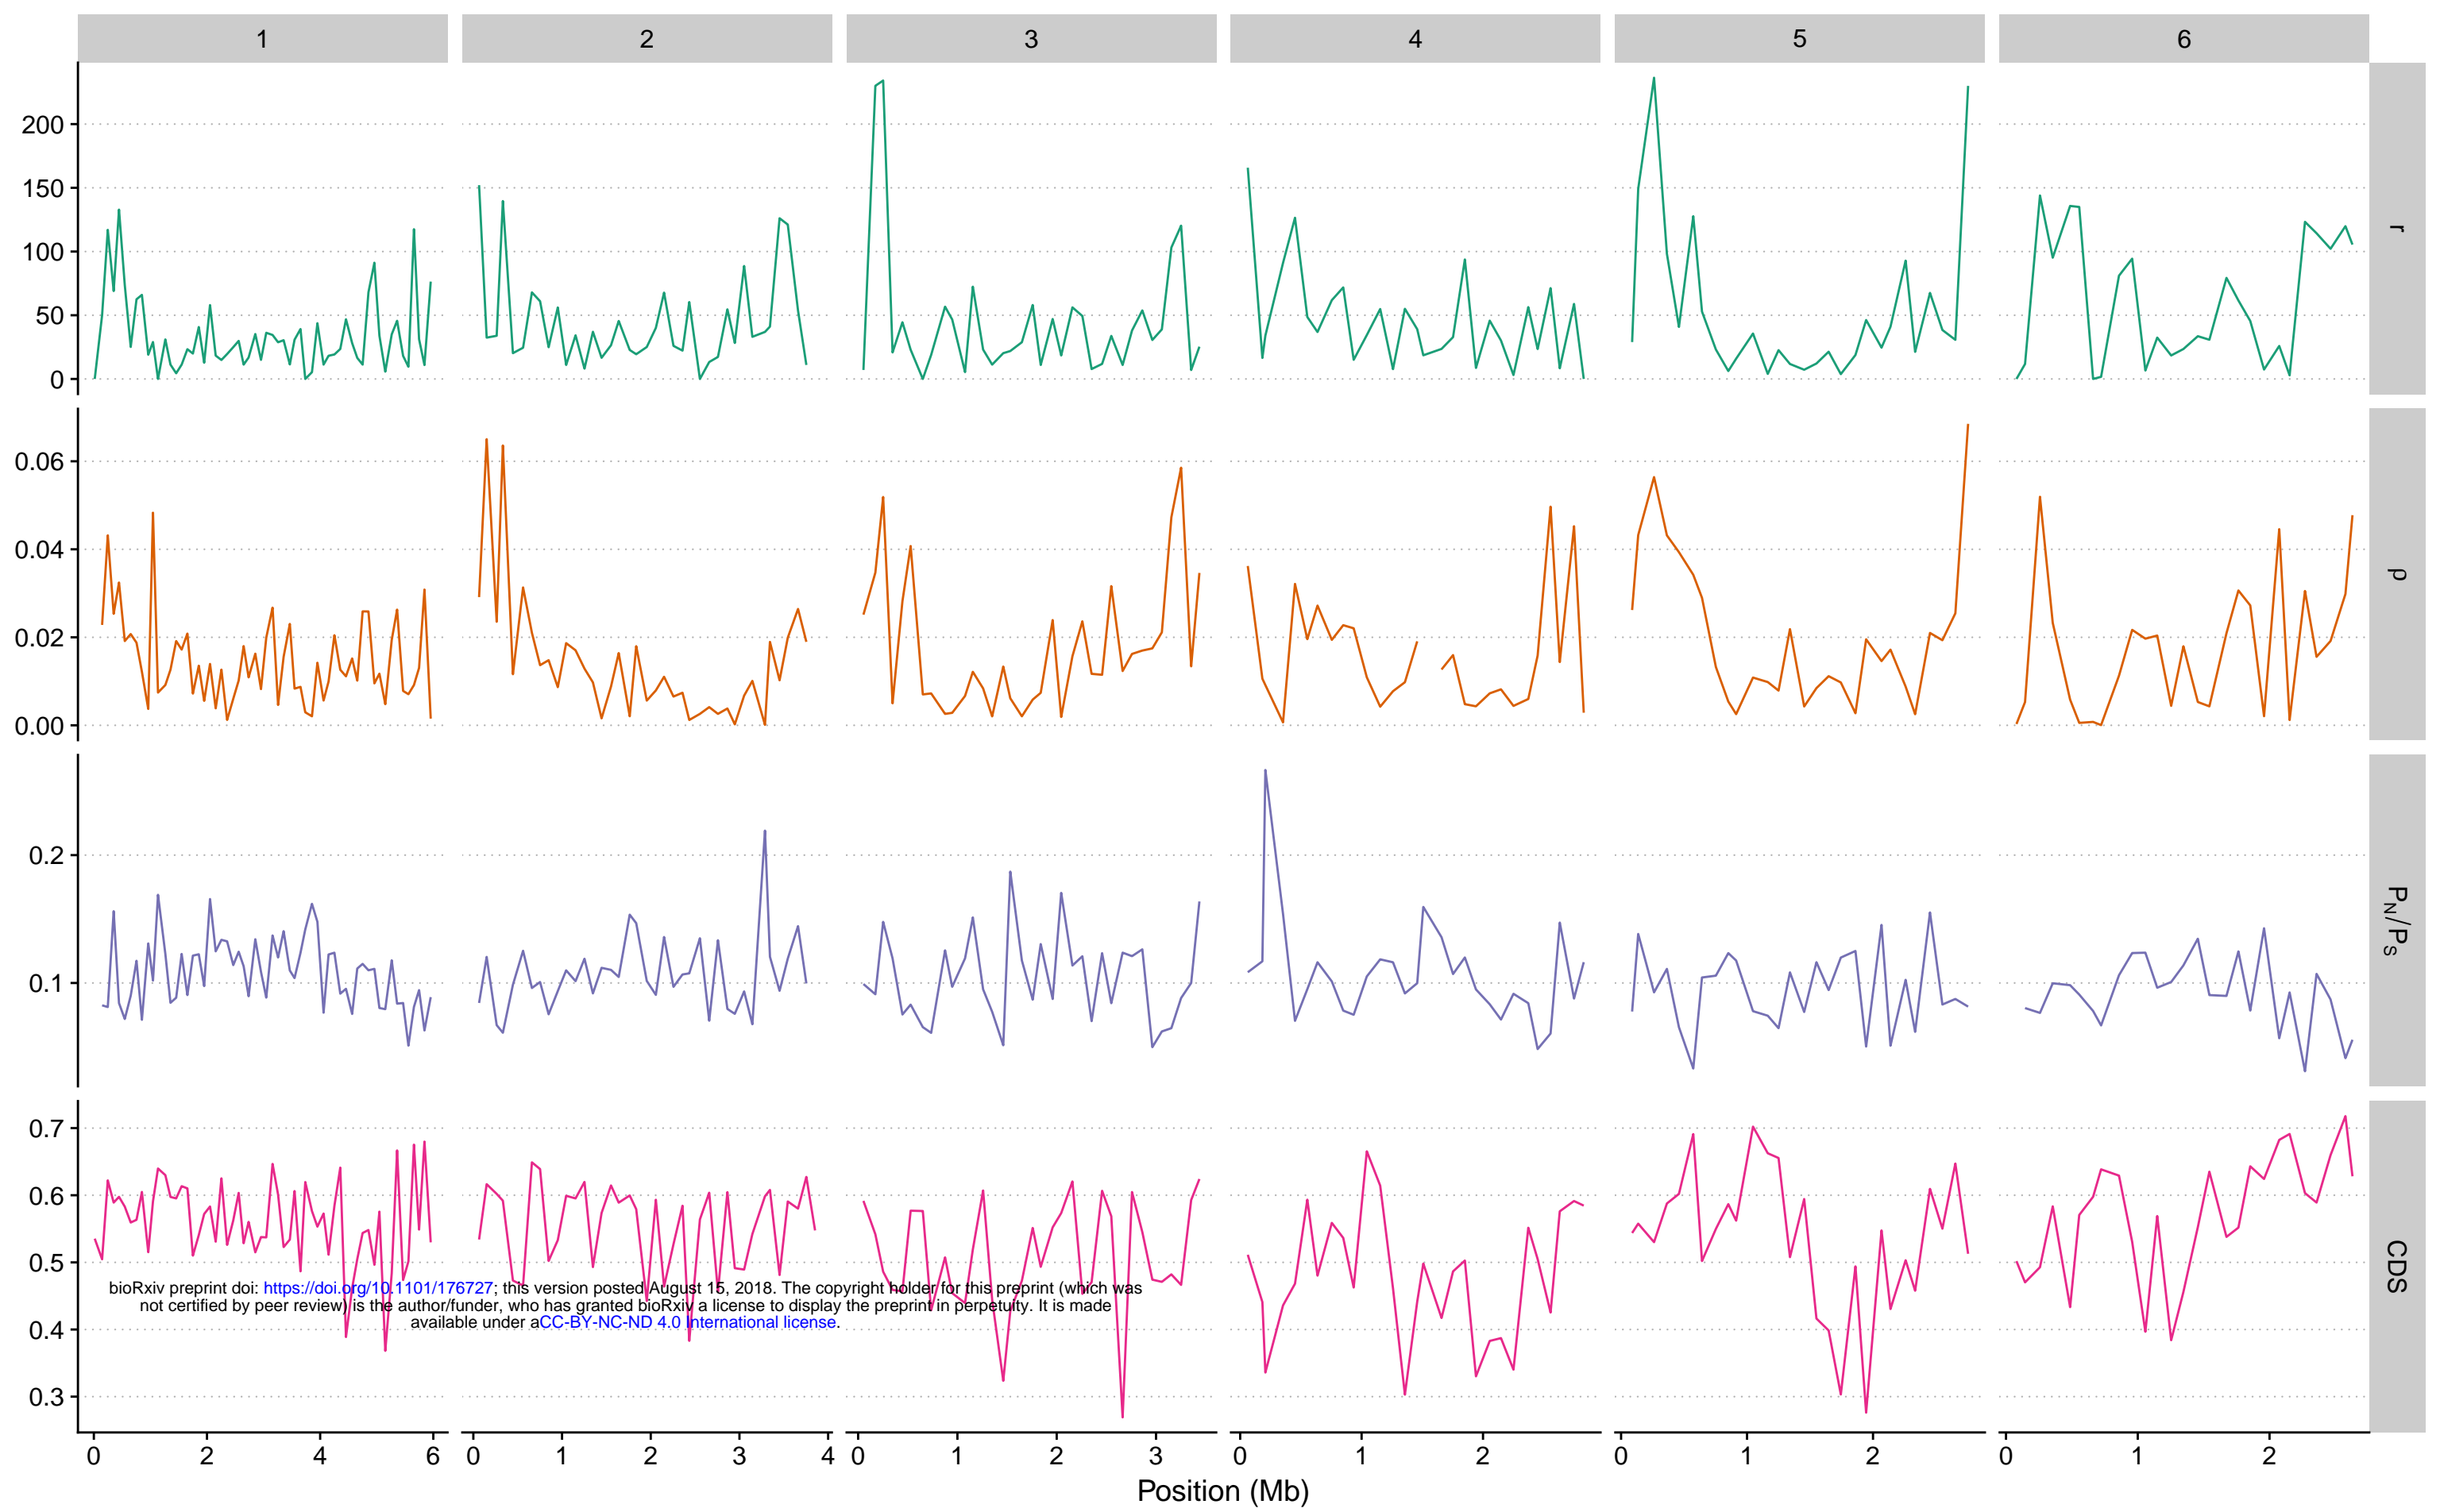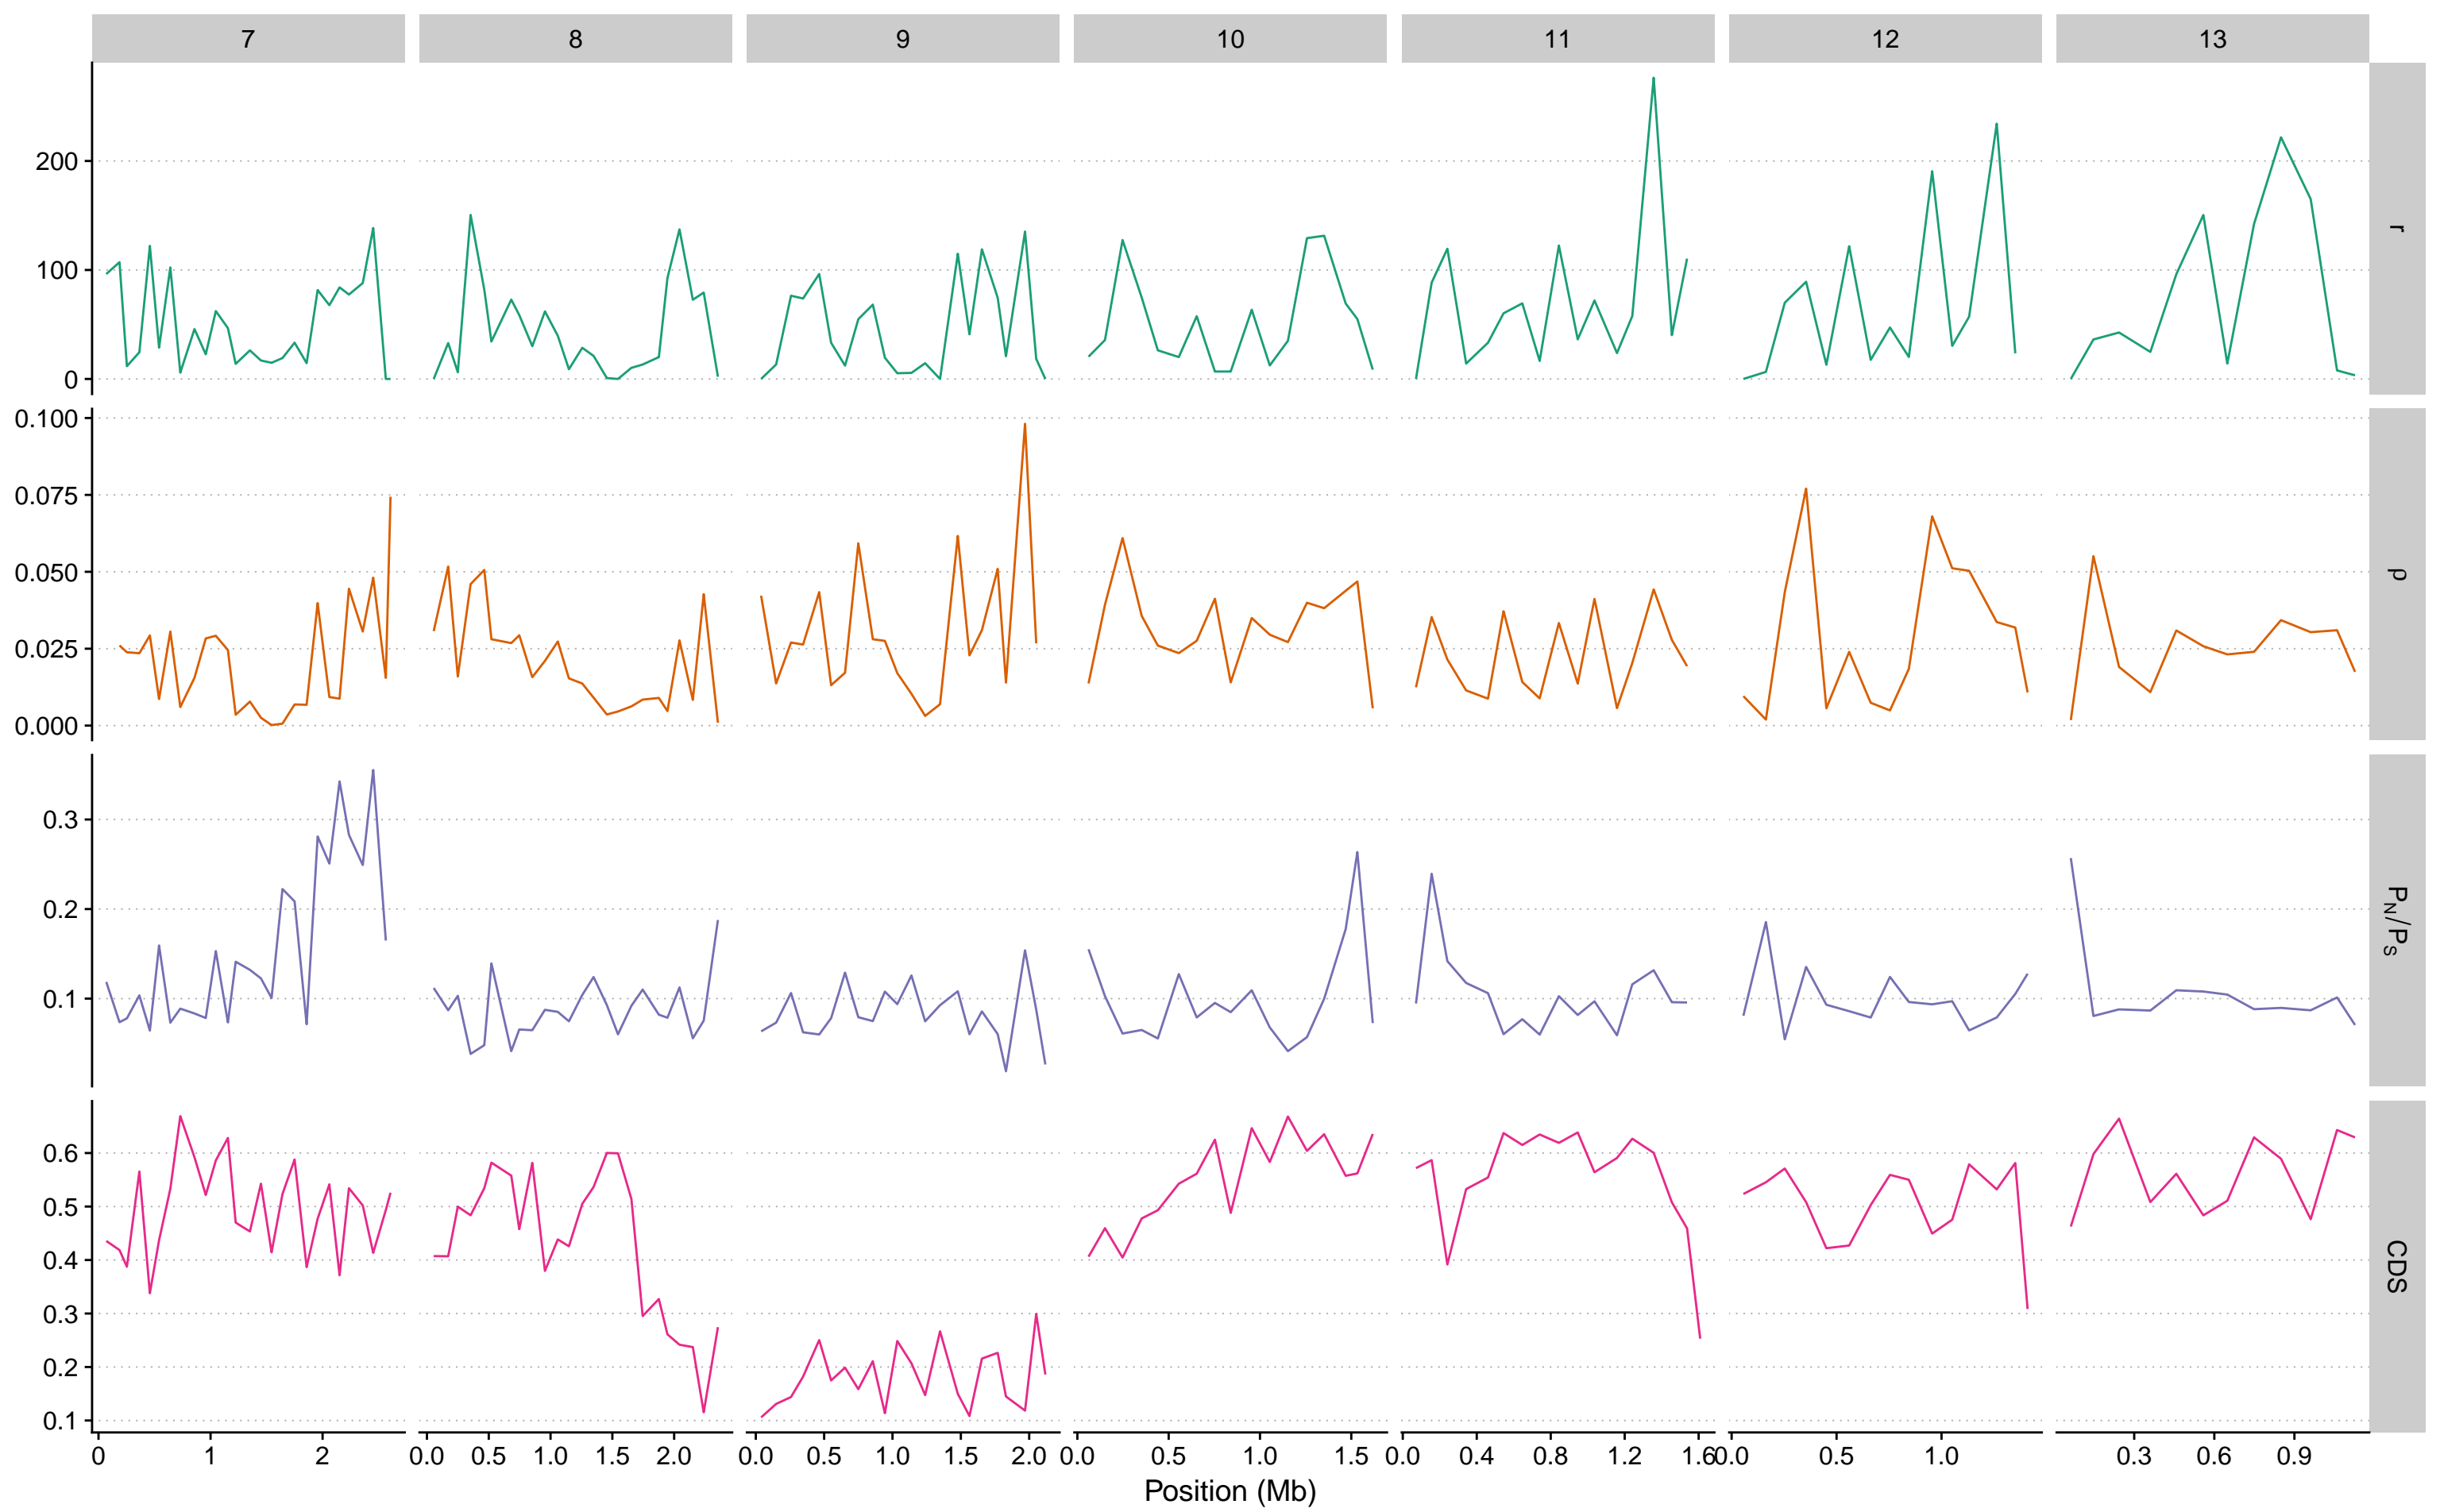

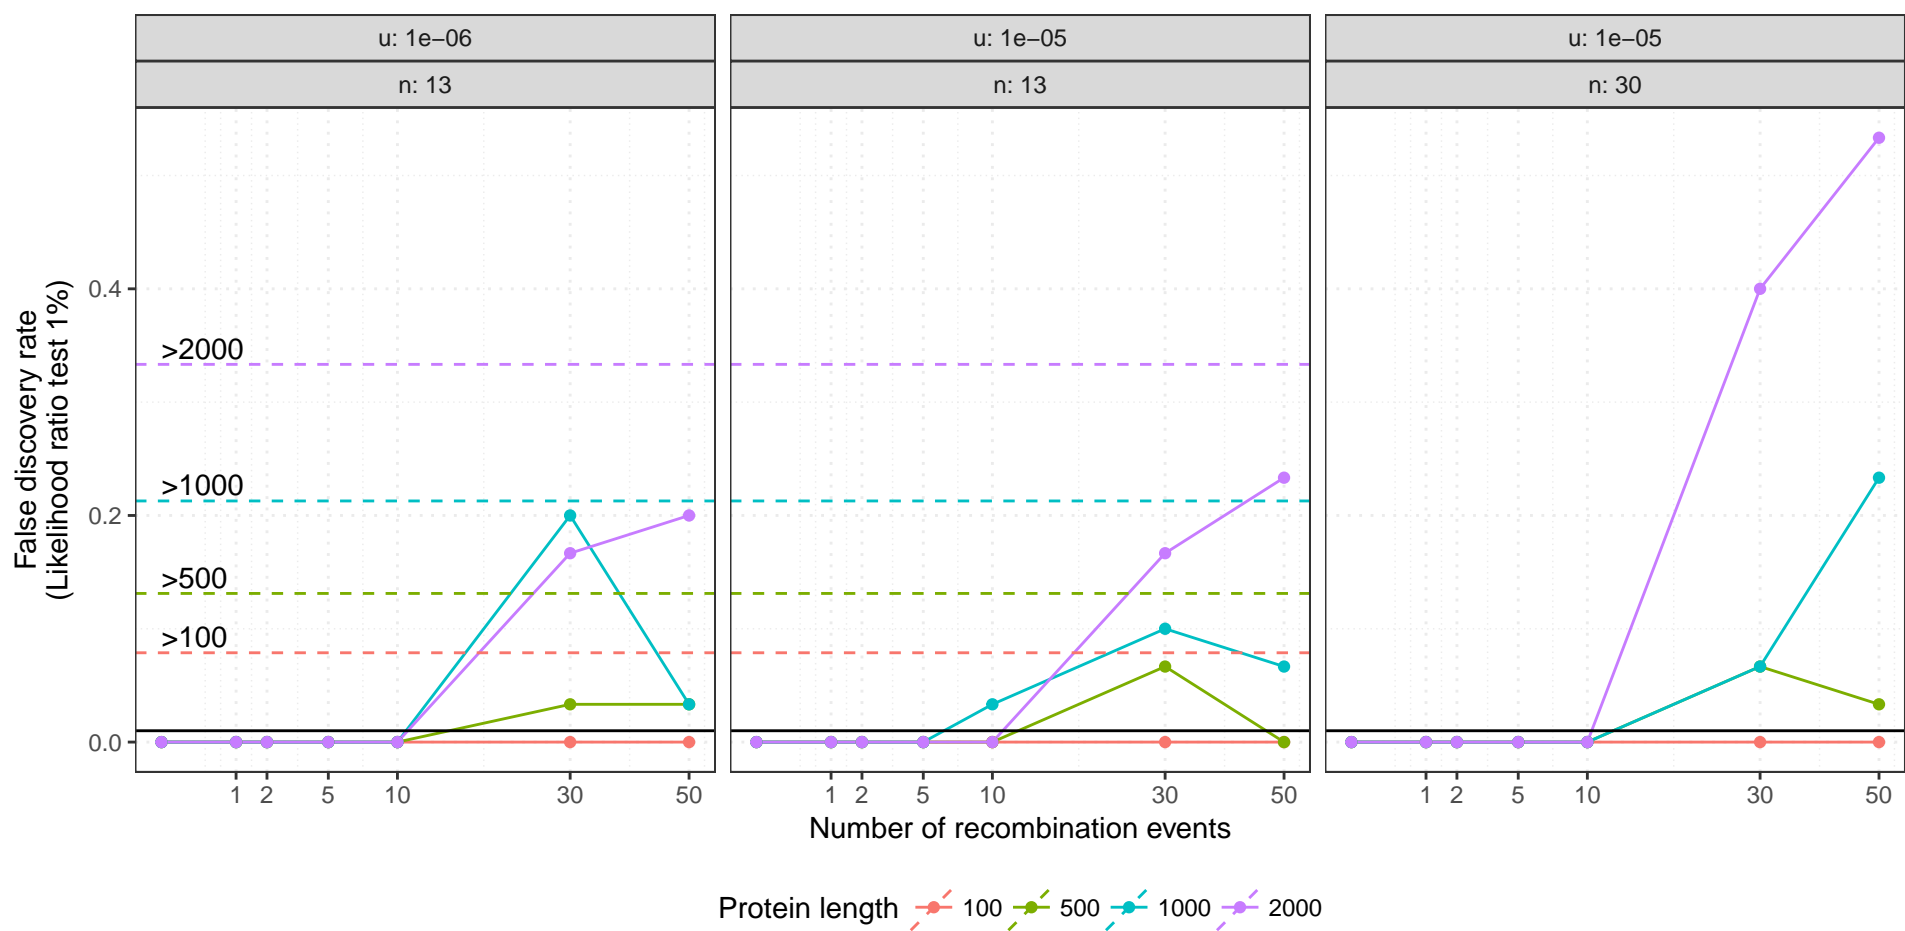

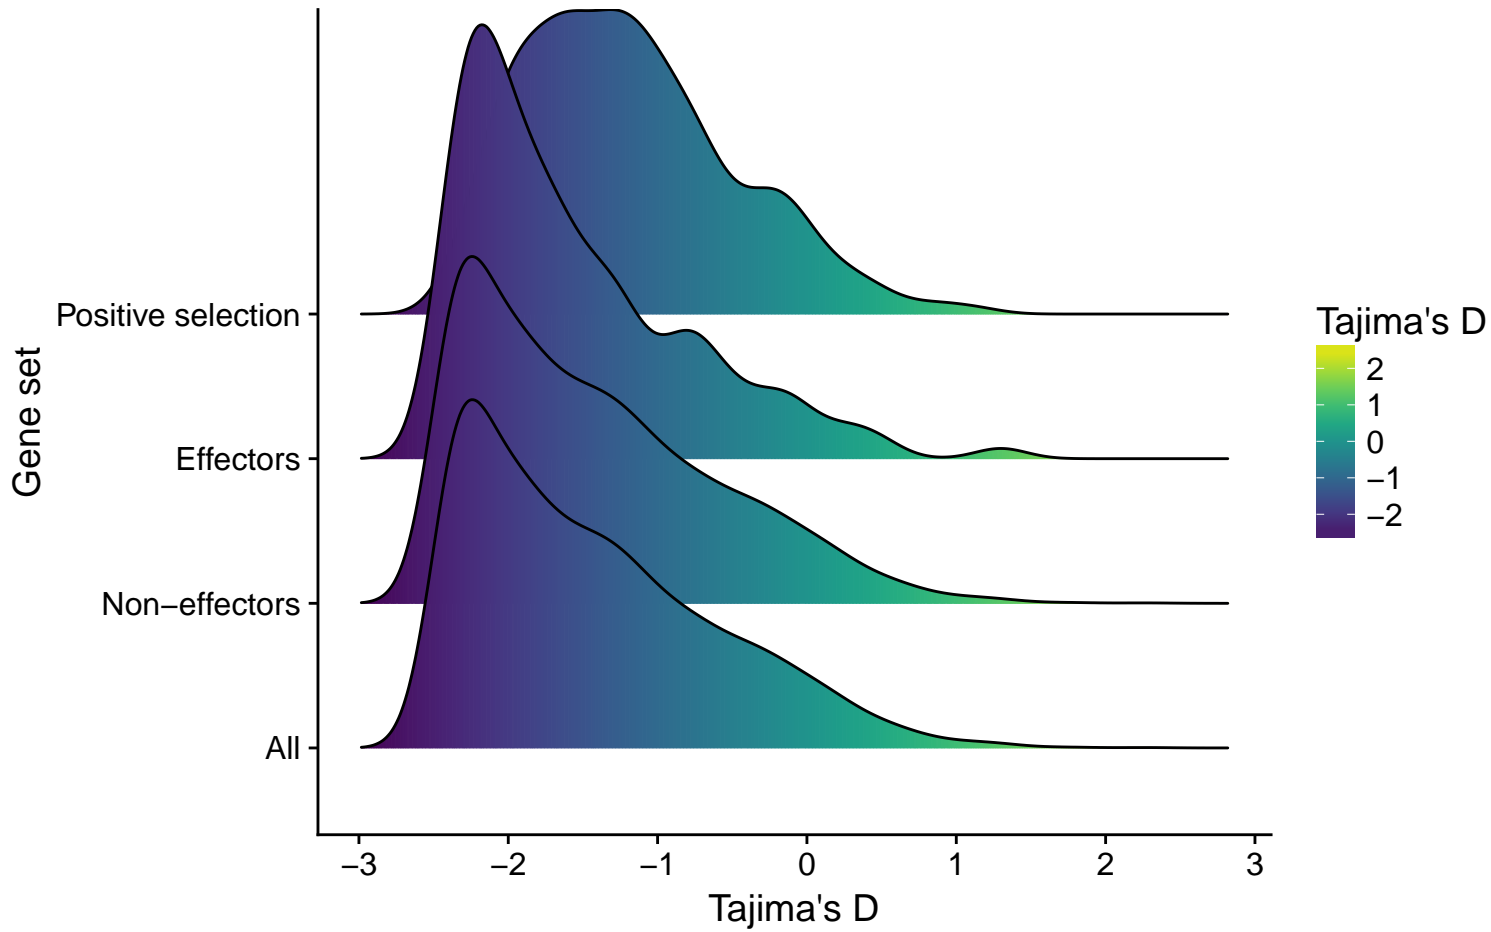

Source: https://www.biorxiv.org/content/10.1101/176727v3.full.pdf
